# Supplementary material for: Single-cell morphological and transcriptome analysis unveil inhibitors of polyploid giant breast cancer cells in vitro
Source: PubMed Central journal article supplement (PMC10739852; doi:10.1038/s42003-023-05674-5), 2023-12-21
Supplement: 42003_2023_5674_MOESM1_ESM.pdf [file 42003_2023_5674_MOESM1_ESM.pdf]

1 **Title:**

2 Single-Cell Morphological and Transcriptome Analysis Unveil Inhibitors of Polyploid Giant  
3 Breast Cancer Cells In Vitro

4 **Authors:**

5 Mengli Zhou<sup>1,2,3</sup>, Yushu Ma<sup>1,2</sup>, Chun-Cheng Chiang<sup>1,2</sup>, Edwin C. Rock<sup>4</sup>, Samuel Charles  
6 Butler<sup>1</sup>, Rajiv Anne<sup>4</sup>, Svetlana Yatsenko<sup>5</sup>, Yinan Gong<sup>1,6</sup>, Yu-Chih Chen<sup>1,2,4,7\*</sup>

7

8 1 UPMC Hillman Cancer Center, University of Pittsburgh, 5115 Centre Ave, Pittsburgh,  
9 PA 15232, USA;

10 2 Department of Computational and Systems Biology, University of Pittsburgh, 3420  
11 Forbes Avenue, Pittsburgh, PA 15260, USA;

12 3 Xiangya Hospital, Central South University, Changsha, Hunan, 410008, China;

13 4 Department of Bioengineering, Swanson School of Engineering, University of Pittsburgh,  
14 3700 O'Hara Street, Pittsburgh, PA 15260, USA;

15 5 Department of Pathology, University of Pittsburgh, Pittsburgh, PA, USA; Department of  
16 Obstetrics, Gynecology and Reproductive Sciences, University of Pittsburgh, Pittsburgh,  
17 PA, USA; Magee Womens Research Institute, Pittsburgh, PA, USA;

18 6 Department of Immunology, University of Pittsburgh School of Medicine, Pittsburgh, PA  
19 15261, USA;

20 7 CMU-Pitt Ph.D. Program in Computational Biology, University of Pittsburgh, 3420  
21 Forbes Avenue, Pittsburgh, PA 15260, USA.

22 \*Corresponding author

23 Yu-Chih Chen

24 5115 Centre Ave, Pittsburgh, PA 15232, USA

25 Tel: 412-623-7701; E-mail: [cheny25@upmc.edu](mailto:cheny25@upmc.edu).

26 **Supplementary Information**

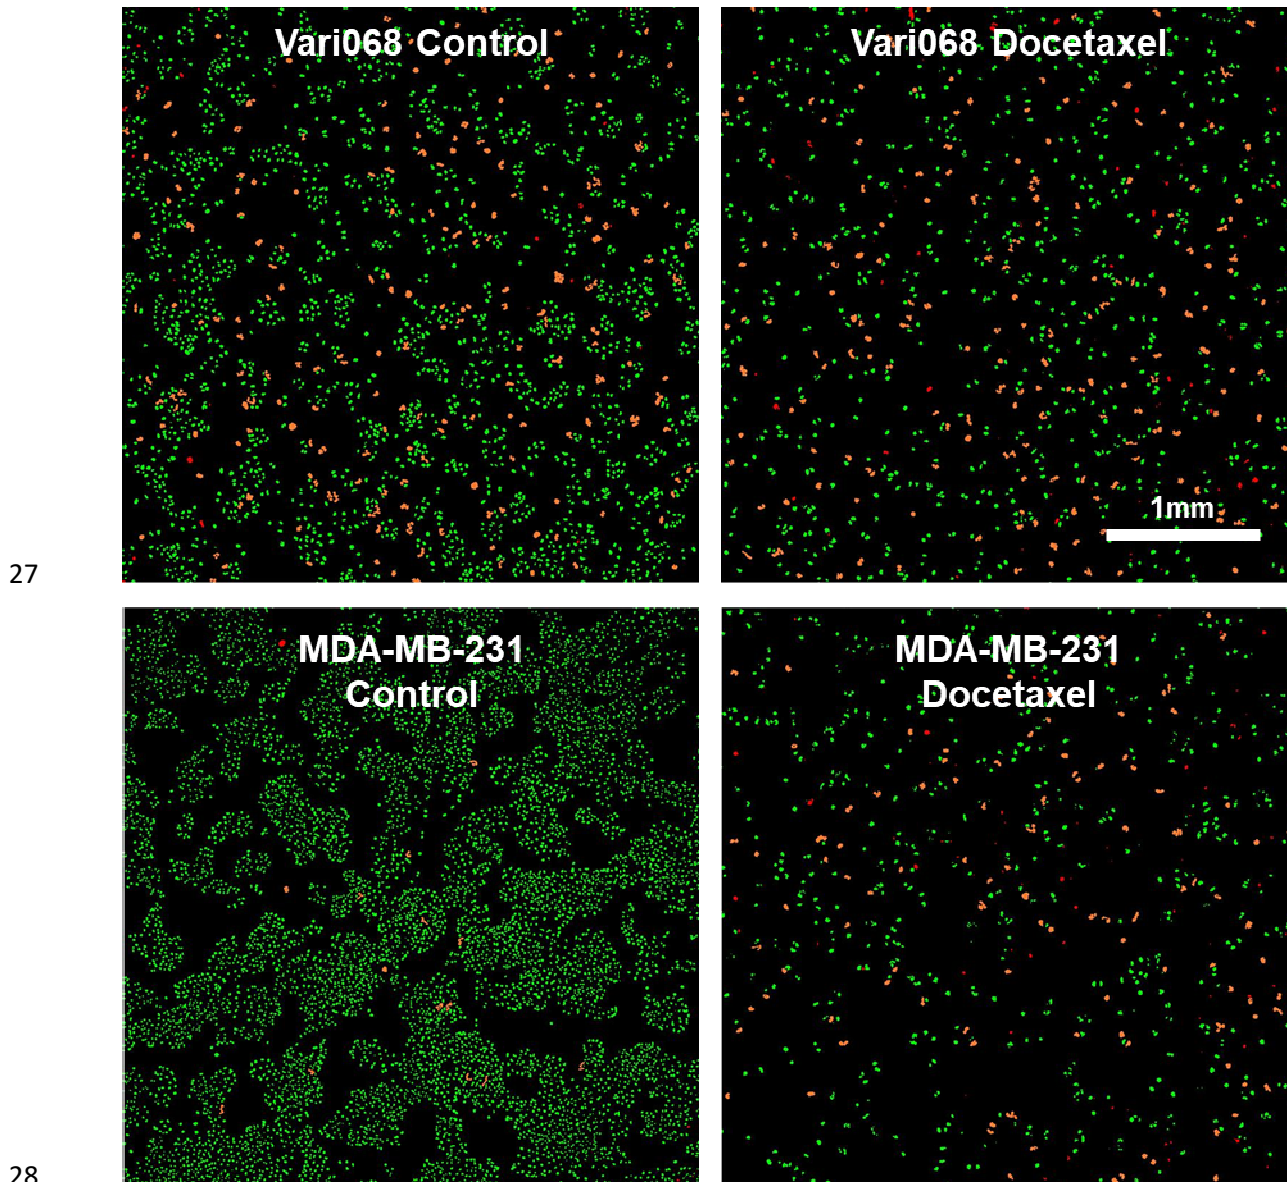

29 **Supplementary Figure 1 Representative Images of Vari068 control and with**  
30 **Docetaxel treatment; MDA-MB-231 control and with Docetaxel treatment.** For  
31 Vari068, without treatment, 2,904 non-PGCCs, 186 PGCCs, and 15 dead cells were  
32 recognized. With Docetaxel treatment, the population was shifted to 905 non-PGCCs,  
33 155 PGCCs, and 124 dead cells. For MDA-MB-231, without treatment, 5,108 non-PGCCs,  
34 4 PGCCs, and 18 dead cells were recognized. With Docetaxel treatment, the population  
35 was shifted to 478 non-PGCCs, 69 PGCCs, and 106 dead cells. Green dots represent  
36 non-PGCCs, orange dots represent PGCCs, and red dots represent dead cells (Scale  
37 bar: 1 mm)

38

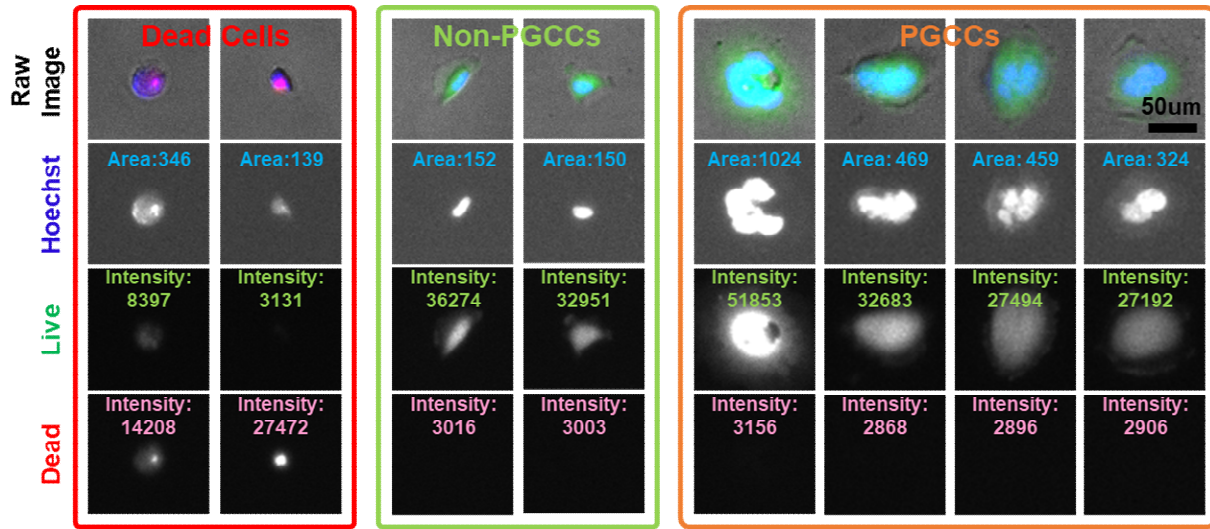

39

40 **Supplementary Figure 2** The detailed image processing and representative PGCC,  
41 **non-PGCC, and dead cell images.** (Scale bar: 50 µm)

a

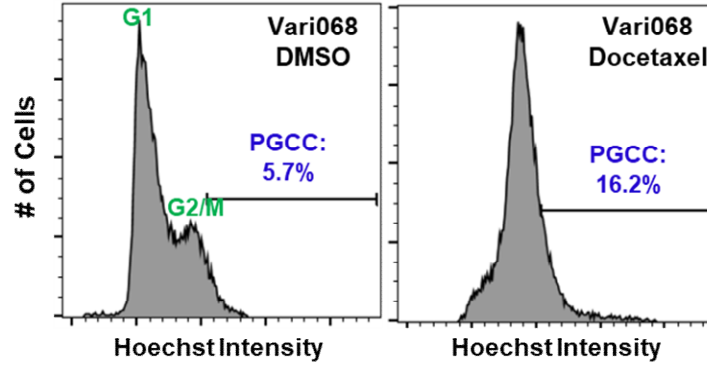

42

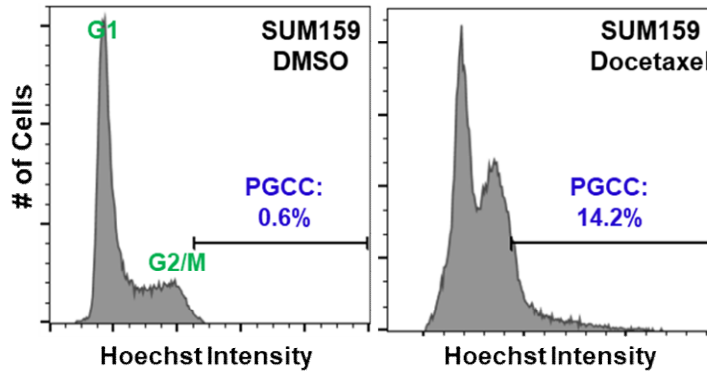

43

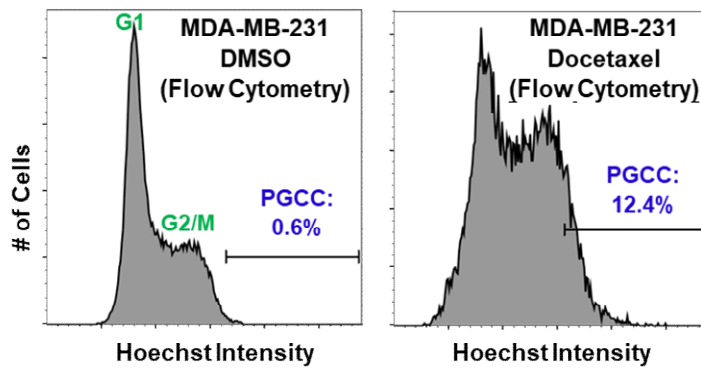

44

b

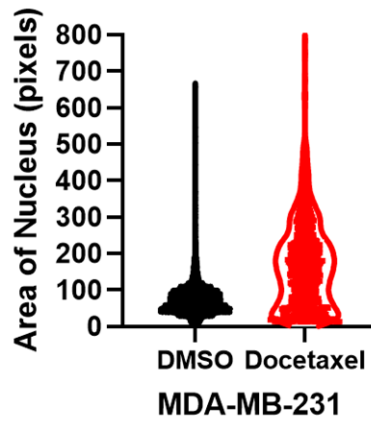

45

46 **Supplementary Figure 3.** Validation experiments of single-cell morphological analysis  
47 and flow cytometry. (a) Flow cytometry for MDA-MB-231. Identification of PGCCs by flow  
48 cytometry according to the fluorescent intensity of Hoechst staining. The live cells having  
49 stronger Hoechst signal than those in the G2/M phase were considered PGCCs. X-axis  
50 represents the intensity of Hoechst (DAPI blue), and Y-axis represents cell numbers. (b)  
51 Identification of PGCCs and non-PGCCs by single-cell morphological analysis according  
52 to the area of cell nuclei. MDA-MB-231 breast cancer cells were treated with DMSO  
53 control (n = 5,970 cells) and 1  $\mu$ M of Docetaxel (n = 549 cells).

54

55

56

57

58

59

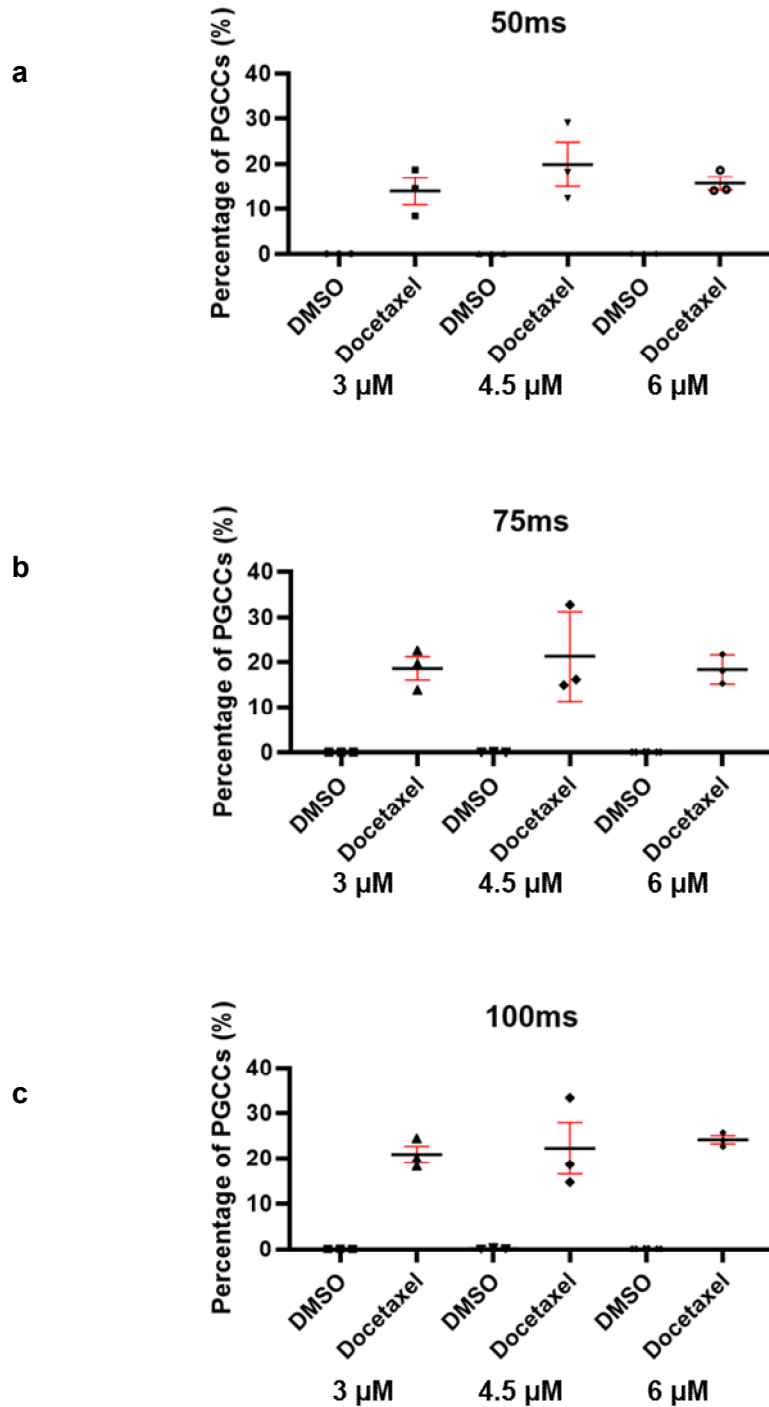

60

61 **Supplementary Figure 4.** Validation experiments of morphological analysis. a. The  
 62 microscopy exposure time is 50 ms b. The microscopy exposure time is 75 ms c. The  
 63 microscopy exposure time is 100 ms. X-axis represents different Hoechst staining  
 64 concentrations (3  $\mu$ M, 4.5  $\mu$ M, 6  $\mu$ M) and different treatments (DMSO control, Docetaxel).  
 65 Y-axis represents the percentage of PGCCs (%). Error bars indicate standard error of the  
 66 mean (SEM). N = 3.

67

68

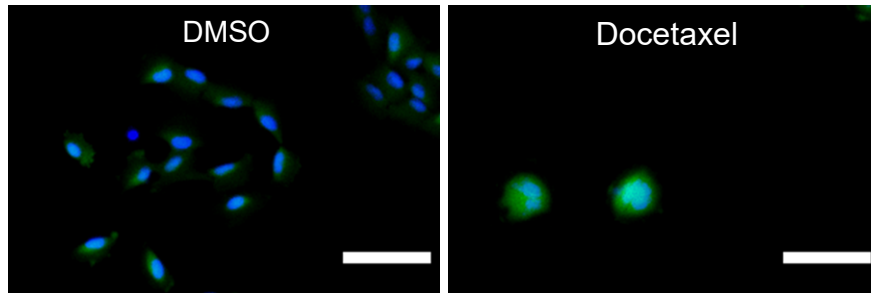

69

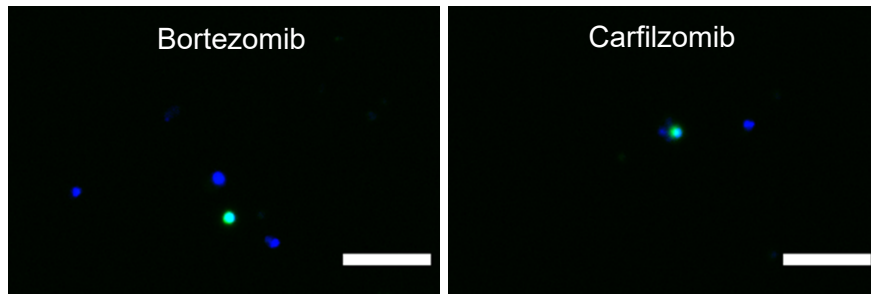

70

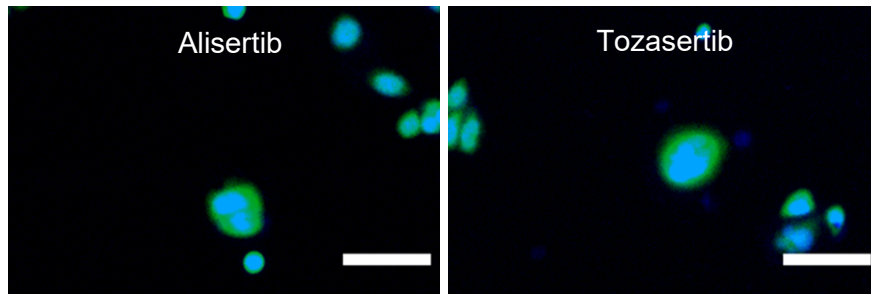

71

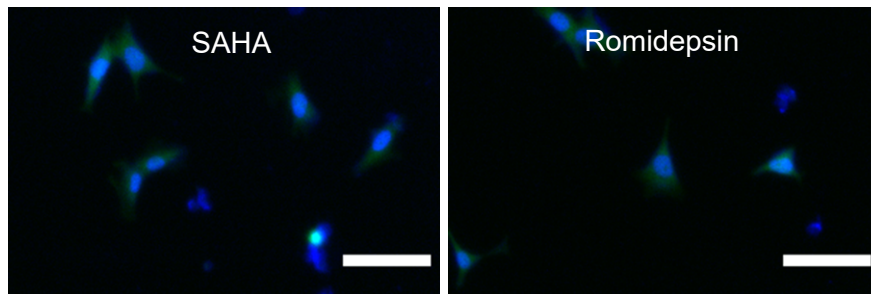

72

73 **Supplementary Figure 5. Representative Images of Compounds cytotoxic effects**

74 **screening Experiments** Representative images of SUM159 treated with DMSO control,

75 1  $\mu$ M of Docetaxel, Bortezomib and Carfilzomib (proteasome inhibitors), Alisertib and

76 Tozasertib (aurora inhibitors), SAHA and Romidepsin (HDAC inhibitors). Cells were

77 stained with LIVE (green), Dead (red) and Hoechst (blue) staining. (Scale bar: 100  $\mu$ m)

78

79

80

81

82

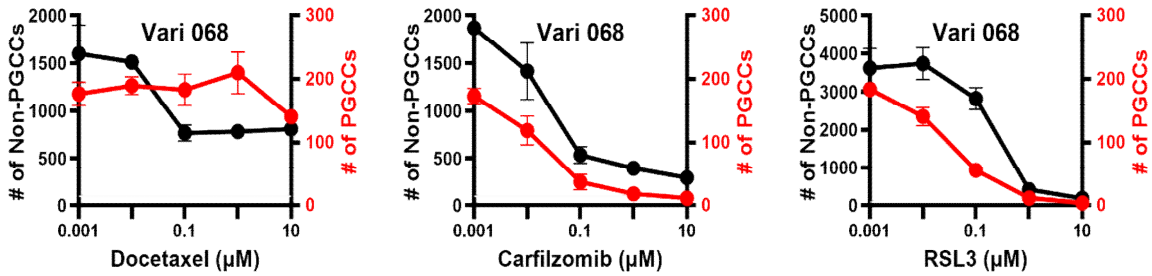

83

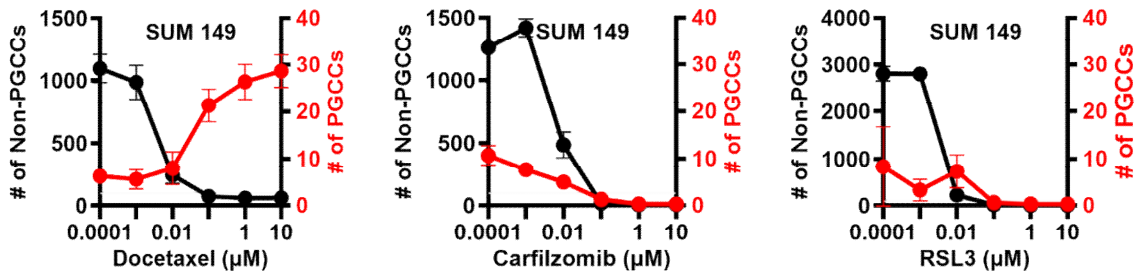

84

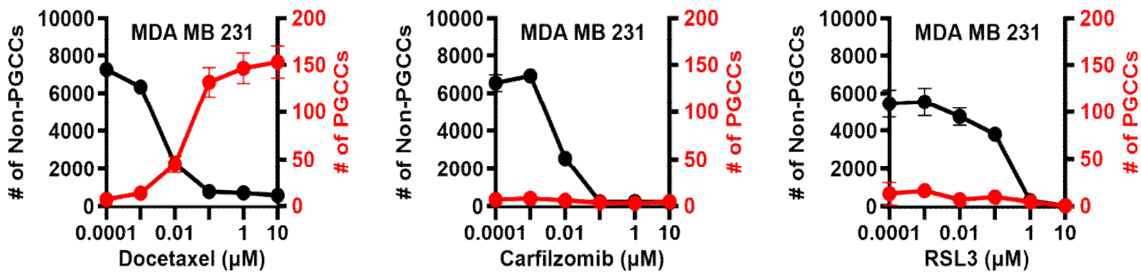

85

86 **Supplementary Figure 6. Cytotoxicity tests using Vari068, SUM149, and MDA-MB-**  
87 **231.** Cytotoxicity tests of selected compounds with 6 concentrations using Vari 068,  
88 SUM149 and MDA-MB-231 cells. Docetaxel, Carfilzomib, and RSL3 were selected to test  
89 6 concentrations: 10  $\mu\text{M}$ , 1  $\mu\text{M}$ , 0.1  $\mu\text{M}$ , 0.01  $\mu\text{M}$ , 0.001  $\mu\text{M}$  and 0.0001  $\mu\text{M}$ . The black  
90 curve is plotted based on the number of non-PGCCs, and red curve is plotted based on  
91 the number of PGCCs. The X-axis represents concentrations of the selected compounds.  
92 The left Y-axis (black) represents the number of non-PGCCs, and the right Y-axis (red)  
93 represents the number of PGCCs. Error bars indicate the standard error of the mean  
94 (SEM). N = 3.

95

96

97



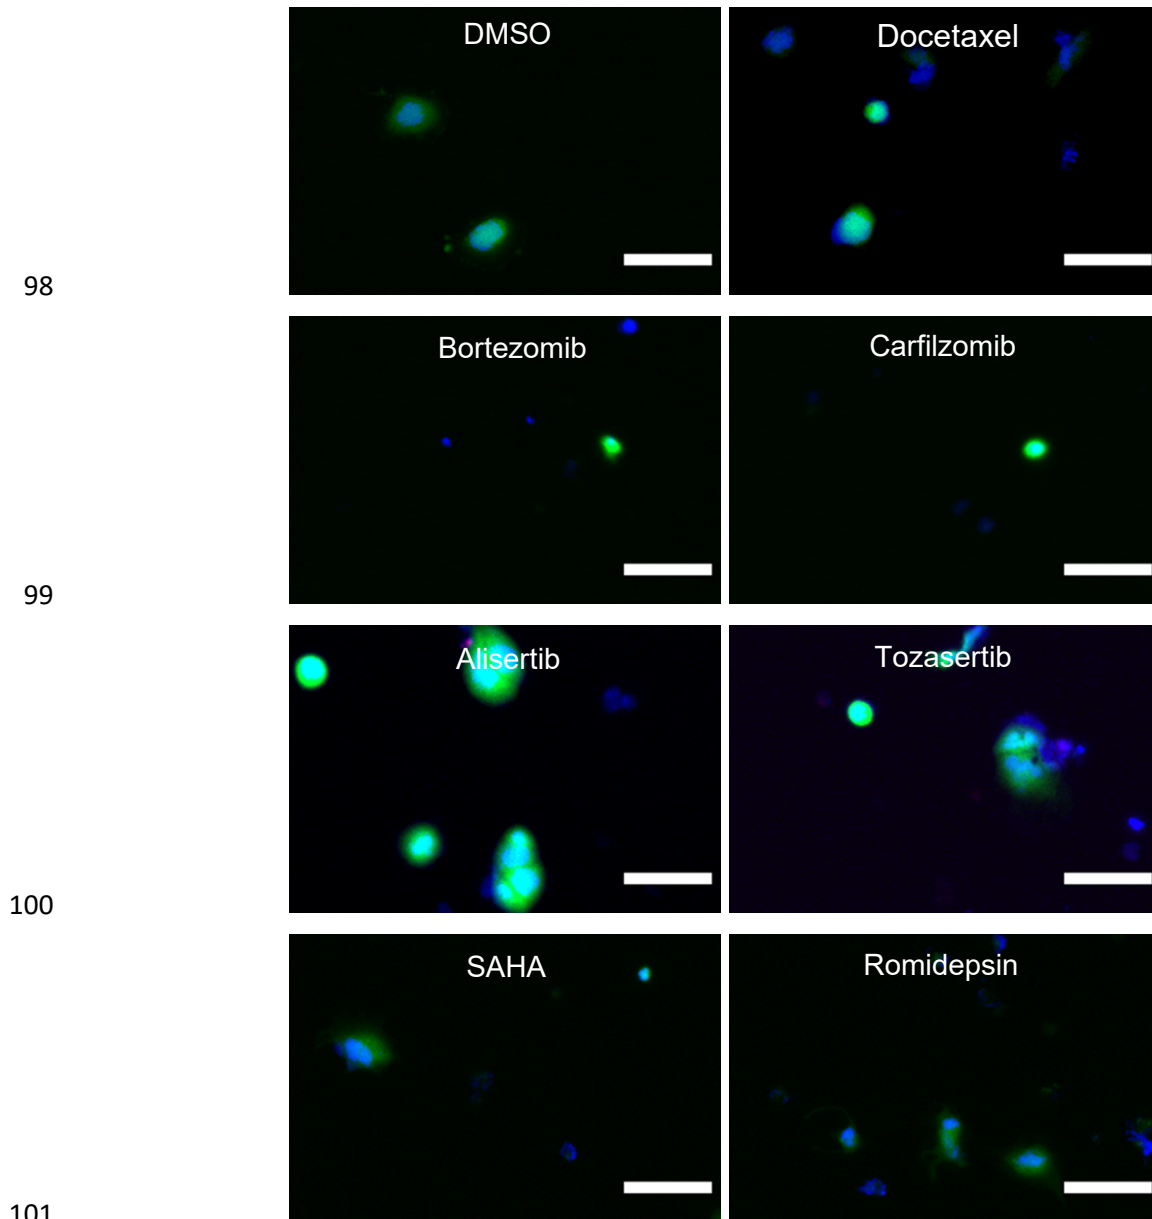

102 **Supplementary Figure 7. Representative Images of Discover Screening for Anti-**  
103 **PGCCs Compounds.** Representative images of SUM159 treated with DMSO control, 1  
104  $\mu\text{M}$  of Docetaxel, Bortezomib and Carfilzomib (proteasome inhibitors), Alisertib and  
105 Tozasertib (aurora inhibitors), SAHA and Romidepsin (HDAC inhibitors). Cells were  
106 stained with LIVE (green), Dead (red) and Hoechst (blue) staining. (Scale bar: 100  $\mu\text{m}$ )

107

108

109

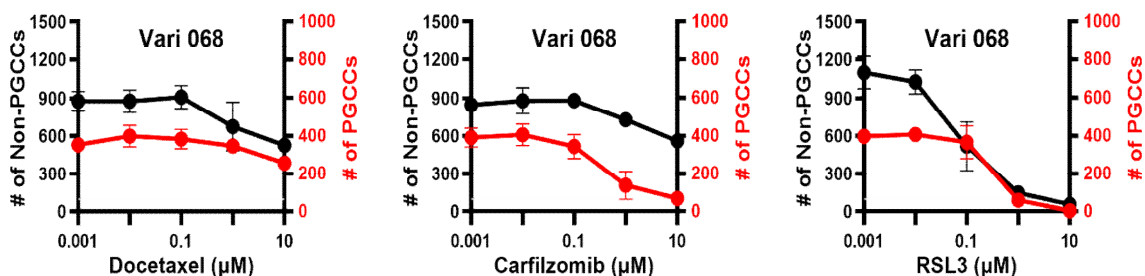

110

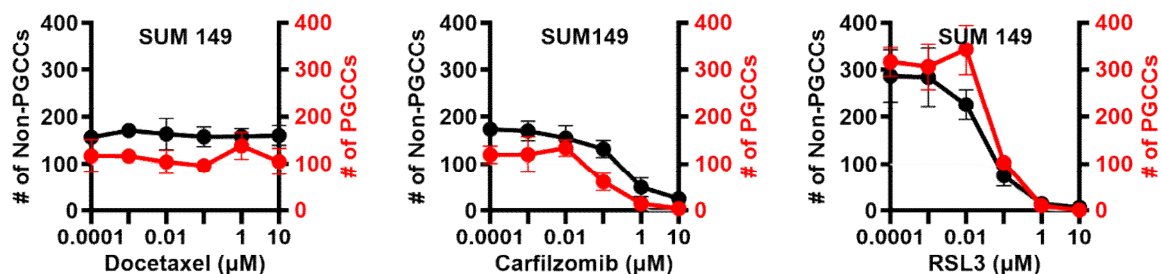

111

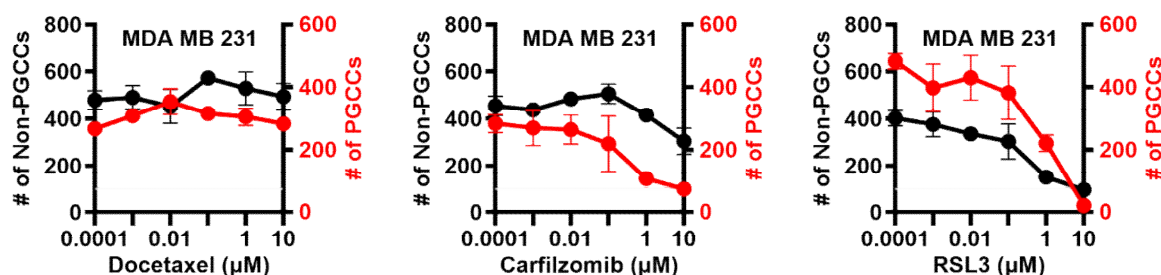

112

113 **Supplementary Figure 8. Inhibition effects of PGCCs tests using Vari068, SUM149**  
114 **and MDA-MB-231.** Inhibition of PGCCs tests of selected compounds with 6  
115 concentrations using Vari068, SUM149 and MDA-MB-231 cells. Docetaxel, Carfilzomib,  
116 and RSL3 were selected to test 6 concentrations: 10  $\mu\text{M}$ , 1  $\mu\text{M}$ , 0.1  $\mu\text{M}$ , 0.01  $\mu\text{M}$ , 0.001  
117  $\mu\text{M}$  and 0.0001  $\mu\text{M}$ . Black curve is plotted based on the number of non-PGCCs, and red  
118 curve is plotted based on the number of PGCCs. X-axis represents concentrations of the  
119 selected compounds. Left Y-axis (black) represents the number of non-PGCCs, and right  
120 Y-axis (red) represents the number of PGCCs. Error bars indicate standard error of the  
121 mean (SEM). N = 3.

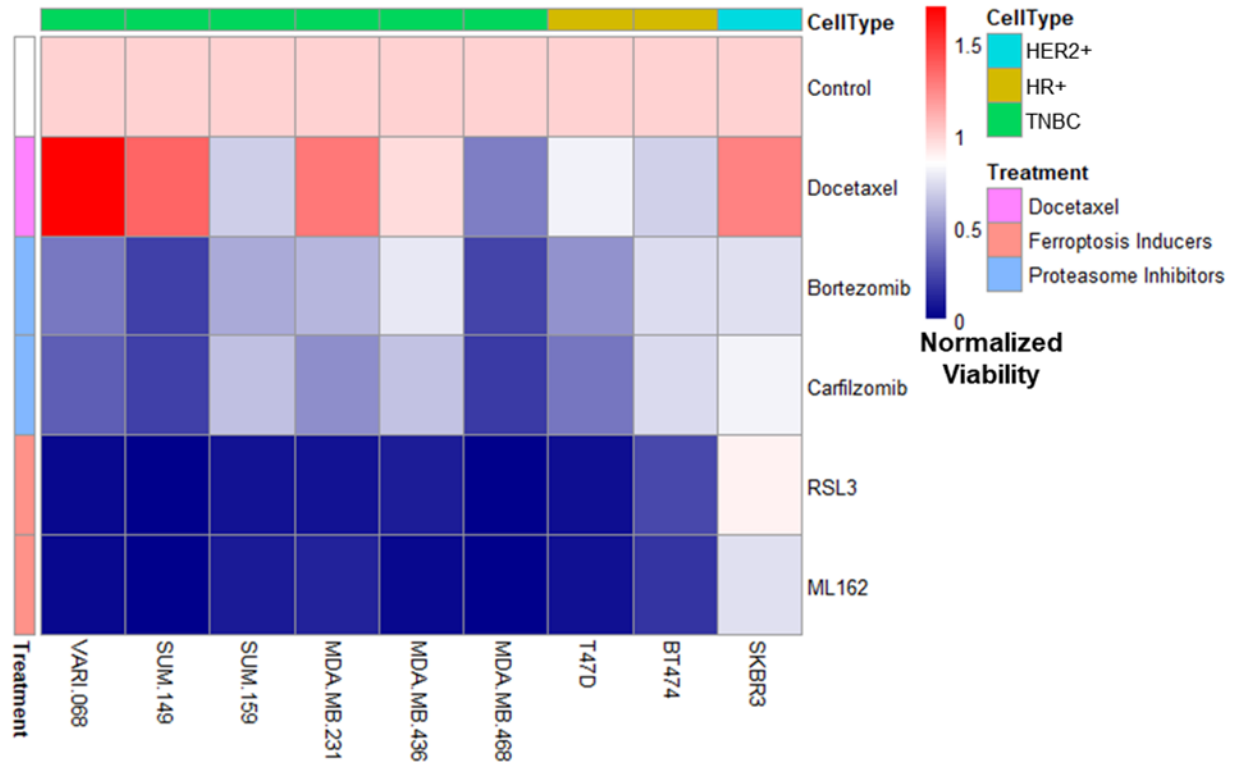

122

123 **Supplementary Figure 9. Validation of anti-PGCC compounds for non-PGCCs with**  
 124 **Docetaxel treatment.** Nine breast cancer cell lines (hormone receptor (HR) positive  
 125 (T47D and BT474), HER2 positive (SKBR3), and TNBC (Vari068, SUM149, SUM159,  
 126 MDA-MB-231, MDA-MB-436, and MDA-MB-468) were tested. Color gradient represents  
 127 the cell viability normalized to the control. Different cell lines treated with Docetaxel were  
 128 resistant to Docetaxel yet responded to proteasome inhibitors and ferroptosis inducers.  
 129 Statistics is provided in Supplementary Table 7.

130

131

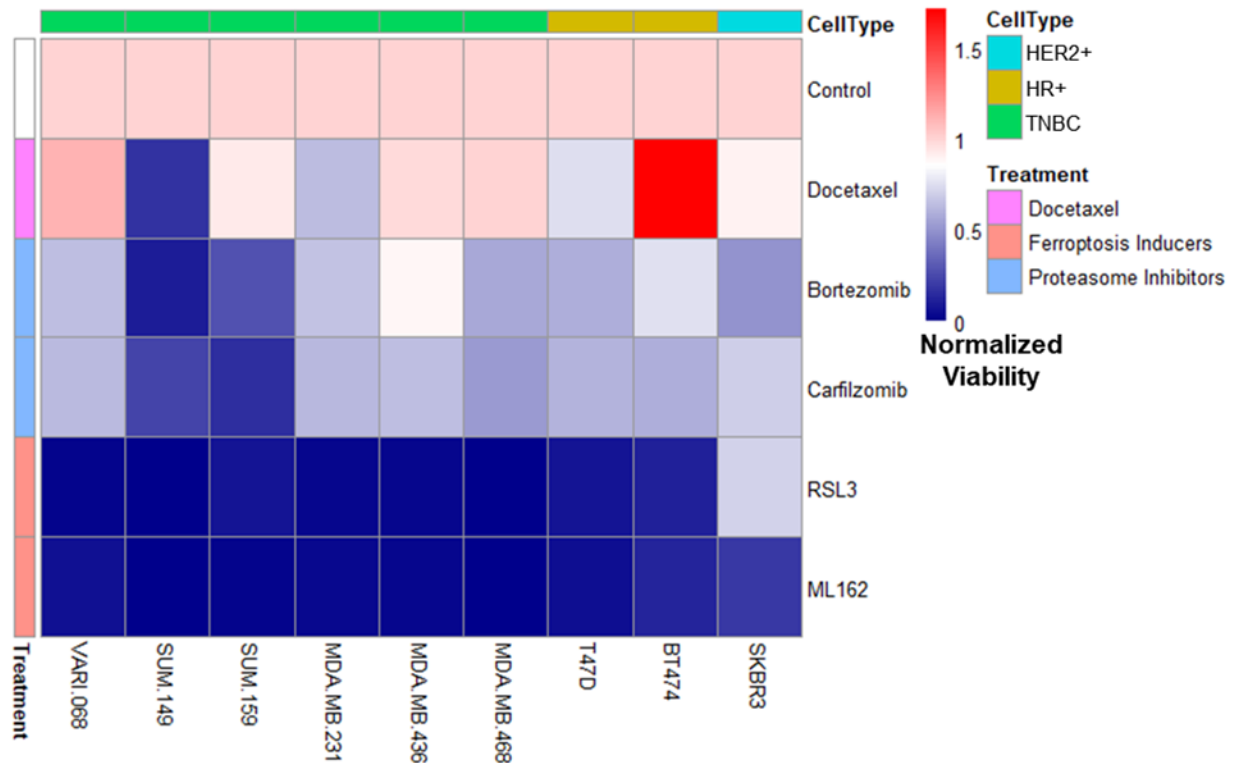

132

133 **Supplementary Figure 10. Validation of anti-PGCC compounds for non-PGCCs with**  
 134 **Paclitaxel treatment.** Nine breast cancer cell lines (hormone receptor (HR) positive  
 135 (T47D and BT474), HER2 positive (SKBR3), and TNBC (Vari068, SUM149, SUM159,  
 136 MDA-MB-231, MDA-MB-436, and MDA-MB-468) were tested. Color gradient represents  
 137 the cell viability normalized to the control. Different cell lines treated with Paclitaxel were  
 138 resistant to Docetaxel yet responded to proteasome inhibitors and ferroptosis inducers.  
 139 Statistics is provided in Supplementary Table 8.

140

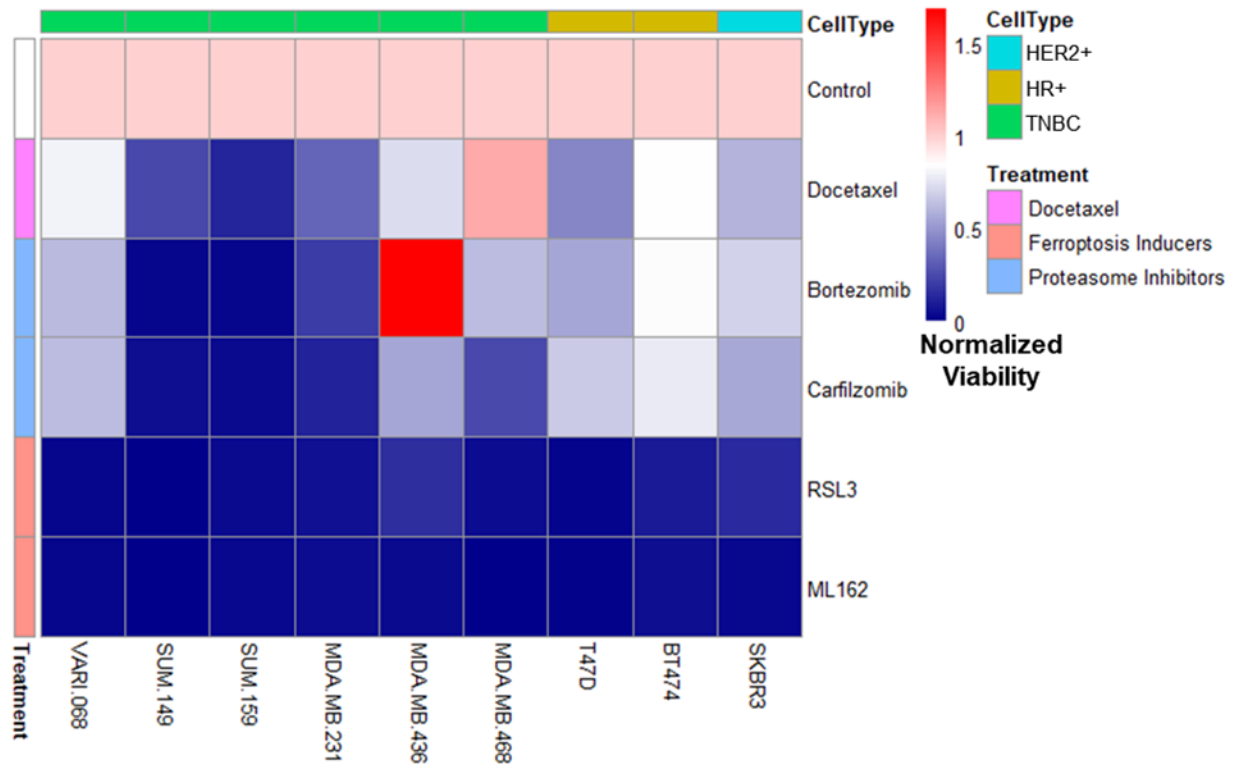

141

142

143 **Supplementary Figure 11. Validation of anti-PGCC compounds for non-PGCCs with**  
 144 **Alisertib treatment.** Nine breast cancer cell lines (hormone receptor (HR) positive (T47D  
 145 and BT474), HER2 positive (SKBR3), and TNBC (Vari068, SUM149, SUM159, MDA-MB-  
 146 231, MDA-MB-436, and MDA-MB-468) were tested. Color gradient represents the cell  
 147 viability normalized to the control. Different cell lines treated with Alisertib were responded  
 148 to Docetaxel and proteasome inhibitors and ferroptosis inducers. Statistics is provided in  
 Supplementary Table 9.

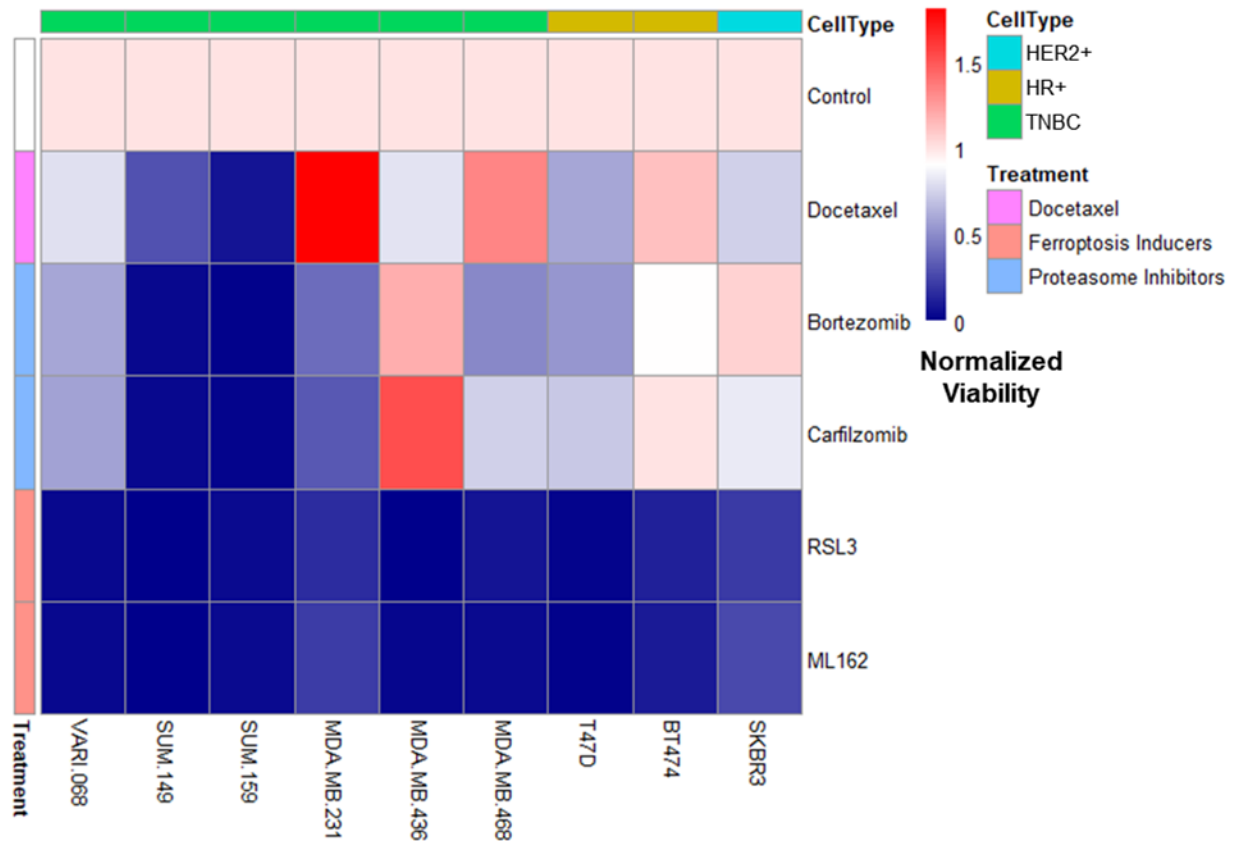

149

150 **Supplementary Figure 12. Validation of anti-PGCC compounds for non-PGCCs with**  
 151 **Tozasertib treatment.** Nine breast cancer cell lines (hormone receptor (HR) positive  
 152 (T47D and BT474), HER2 positive (SKBR3), and TNBC (Vari068, SUM149, SUM159,  
 153 MDA-MB-231, MDA-MB-436, and MDA-MB-468) were tested. Color gradient represents  
 154 the cell viability normalized to the control. Different cell lines treated with Tozasertib were  
 155 responded to Docetaxel and proteasome inhibitors and ferroptosis inducers. Statistics is  
 156 provided in Supplementary Table 10.

157

158

159

160

161

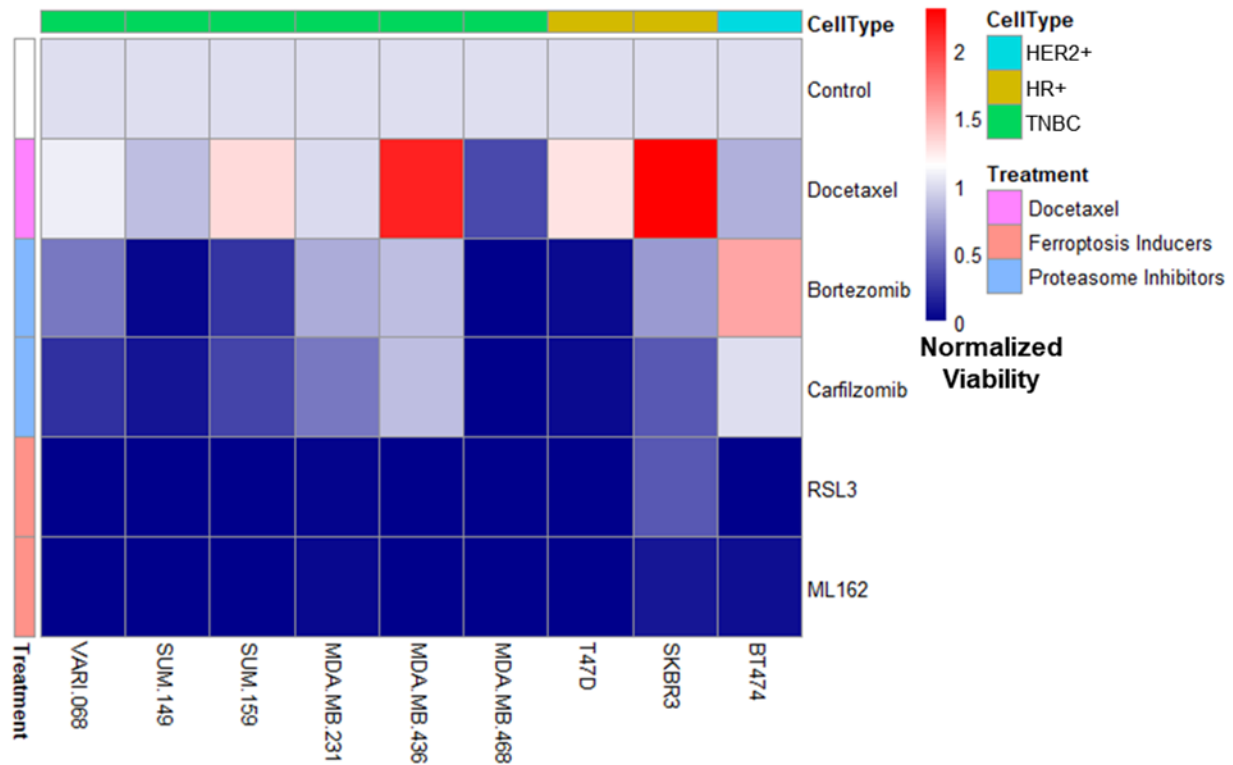

162

163 **Supplementary Figure 13. Validation of anti-PGCC compounds for PGCCs with**  
 164 **Cabazitaxel treatment.** Nine breast cancer cell lines (hormone receptor (HR) positive  
 165 (T47D and BT474), HER2 positive (SKBR3), and TNBC (Vari068, SUM149, SUM159,  
 166 MDA-MB-231, MDA-MB-436, and MDA-MB-468) were tested. Color gradient represents  
 167 the cell viability normalized to the control. PGCCs of different cell lines generated by  
 168 Cabazitaxel were resistant to Docetaxel yet responded to proteasome inhibitors and  
 169 ferroptosis inducers. Statistics is provided in Supplementary Table 11.

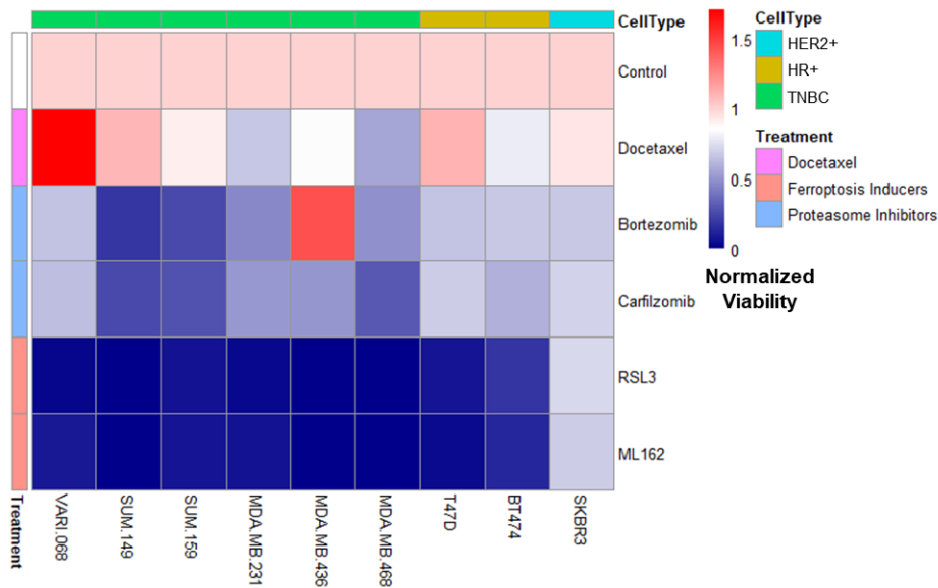

170

171 **Supplementary Figure 14. Validation of anti-PGCC compounds for non-PGCCs with**  
 172 **Cabazitaxel treatment.** Nine breast cancer cell lines (hormone receptor (HR) positive  
 173 (T47D and BT474), HER2 positive (SKBR3), and TNBC (Vari068, SUM149, SUM159,  
 174 MDA-MB-231, MDA-MB-436, and MDA-MB-468) were tested. Color gradient represents  
 175 the cell viability normalized to the control. Different cell lines treated with Cabazitaxel were  
 176 resistant to Docetaxel yet responded to proteasome inhibitors and ferroptosis inducers.  
 177 Statistics is provided in Supplementary Table 12.

178

179

180

181

182

183



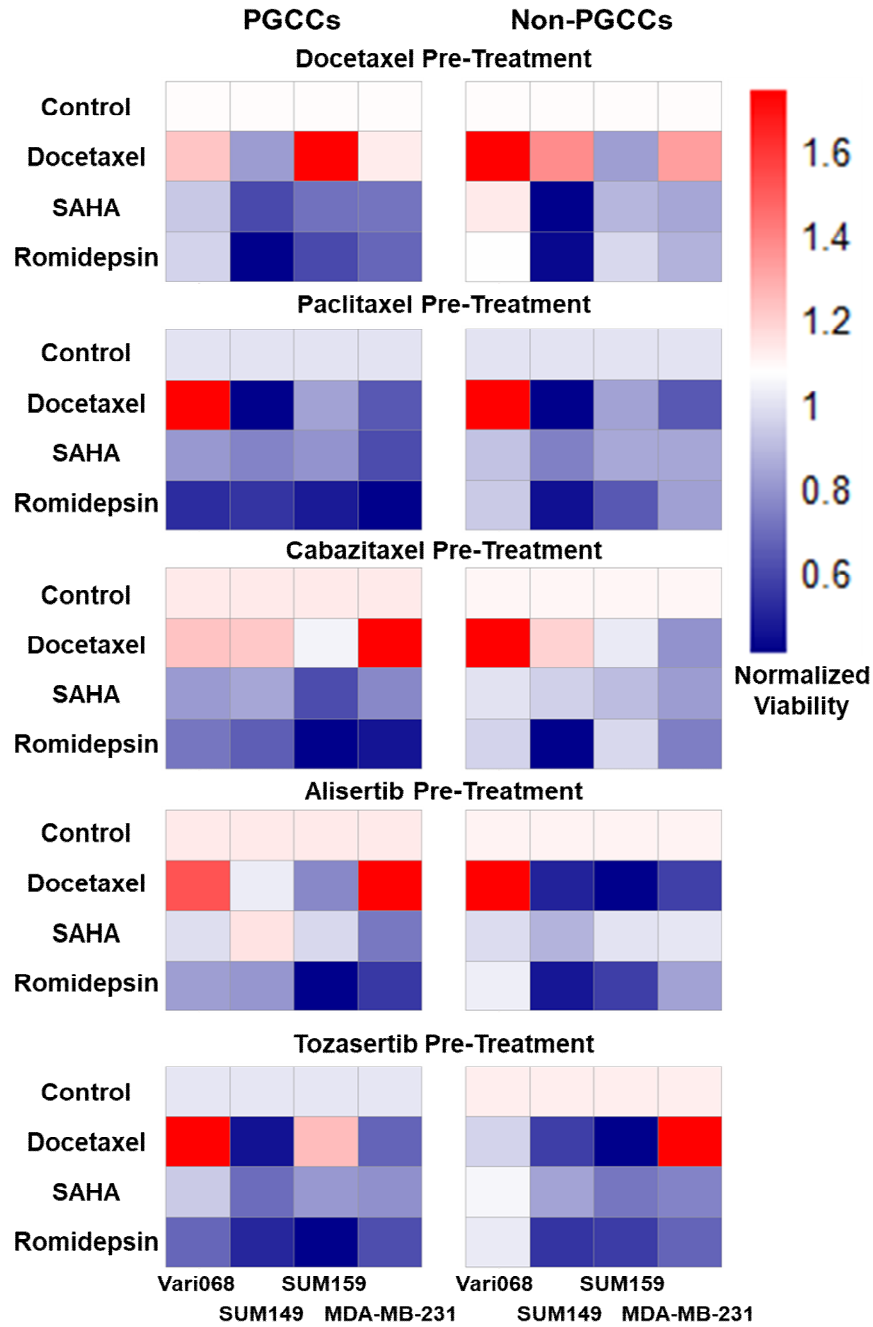

184

185 **Supplementary Figure 15. Validation of anti-PGCC effects for cell lines with**  
 186 **different pre-treatments.** Color gradient represents the cell viability normalized to the  
 187 control. Statistics are provided in Supplementary Table 13-S22.

188

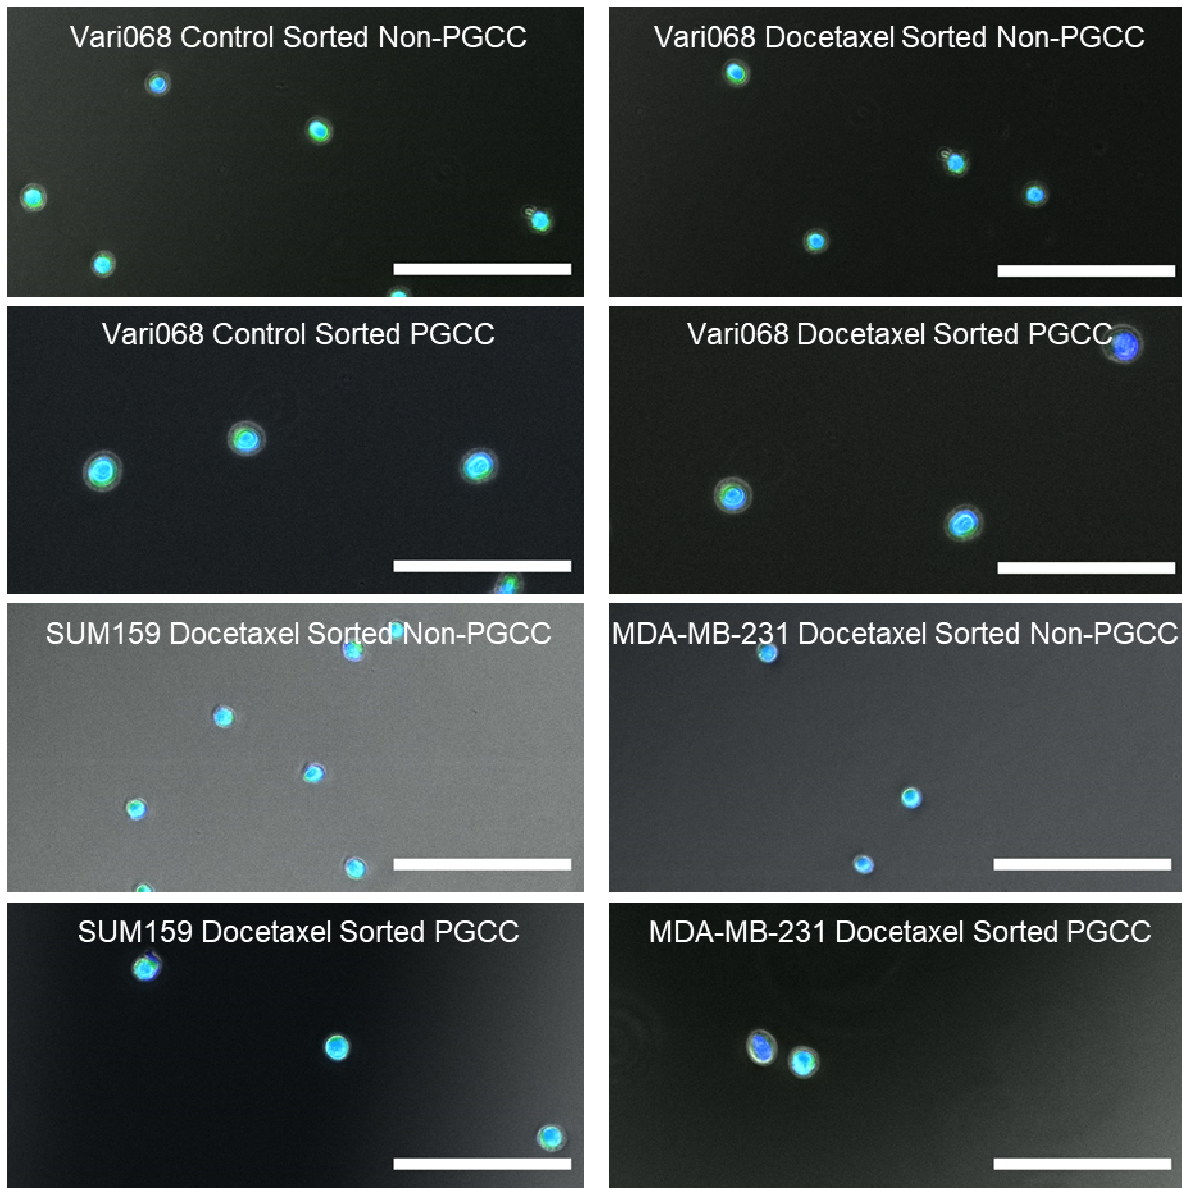

189

190 **Supplementary Figure 16. Representative images for sorted PGCCs and non-**  
191 **PGCCs.** Cells were stained with LIVE (green), Dead (red) and Hoechst (blue) staining.  
192 (Scale bar: 100  $\mu$ m)

193

194

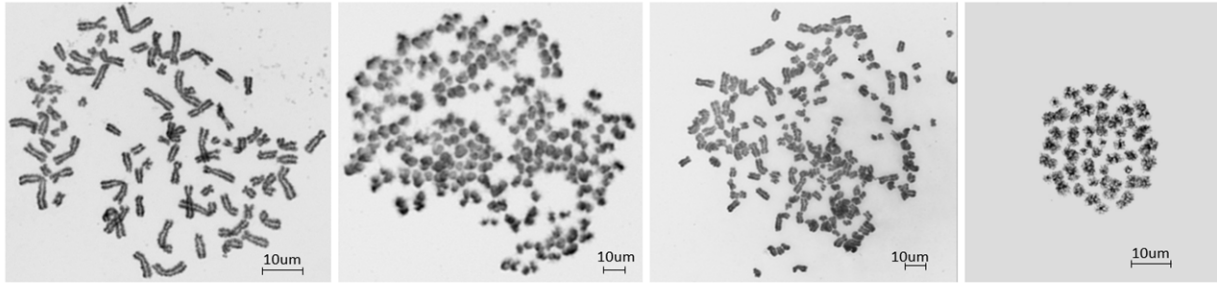

PGCCs - near tetraploid (4n)

PGCCs - near octaploid (8n)

PGCCs - near octaploid (8n)

Non-PGCCs – diploid (2n)

195

196

197

198

**Supplementary Figure 17. karyotyping Docetaxel induced SUM159 PGCCs and non-PGCCs by G-banding metaphase analysis.**

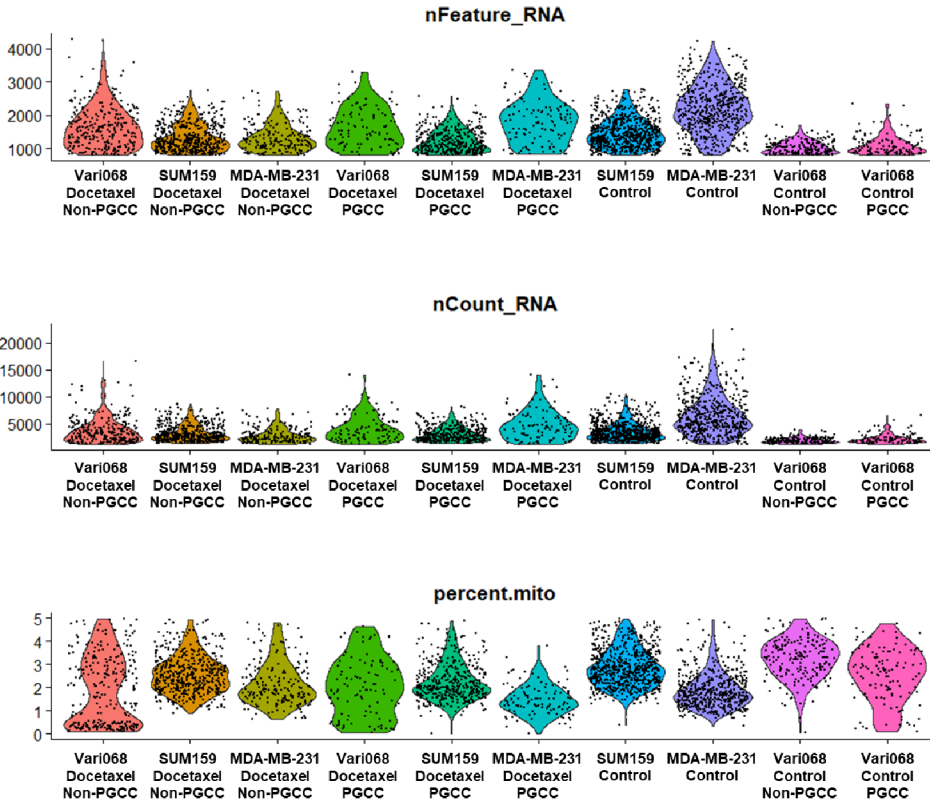

199

200 **Supplementary Figure 18. The quality control of scRNA-Seq data.** The number of  
 201 genes (nFeature\_RNA), the number of transcripts (nCount\_RNA), the percentage of  
 202 mitochondrial genes (percent.mito) of each sample. Each dot represents a cell.

203

204

205

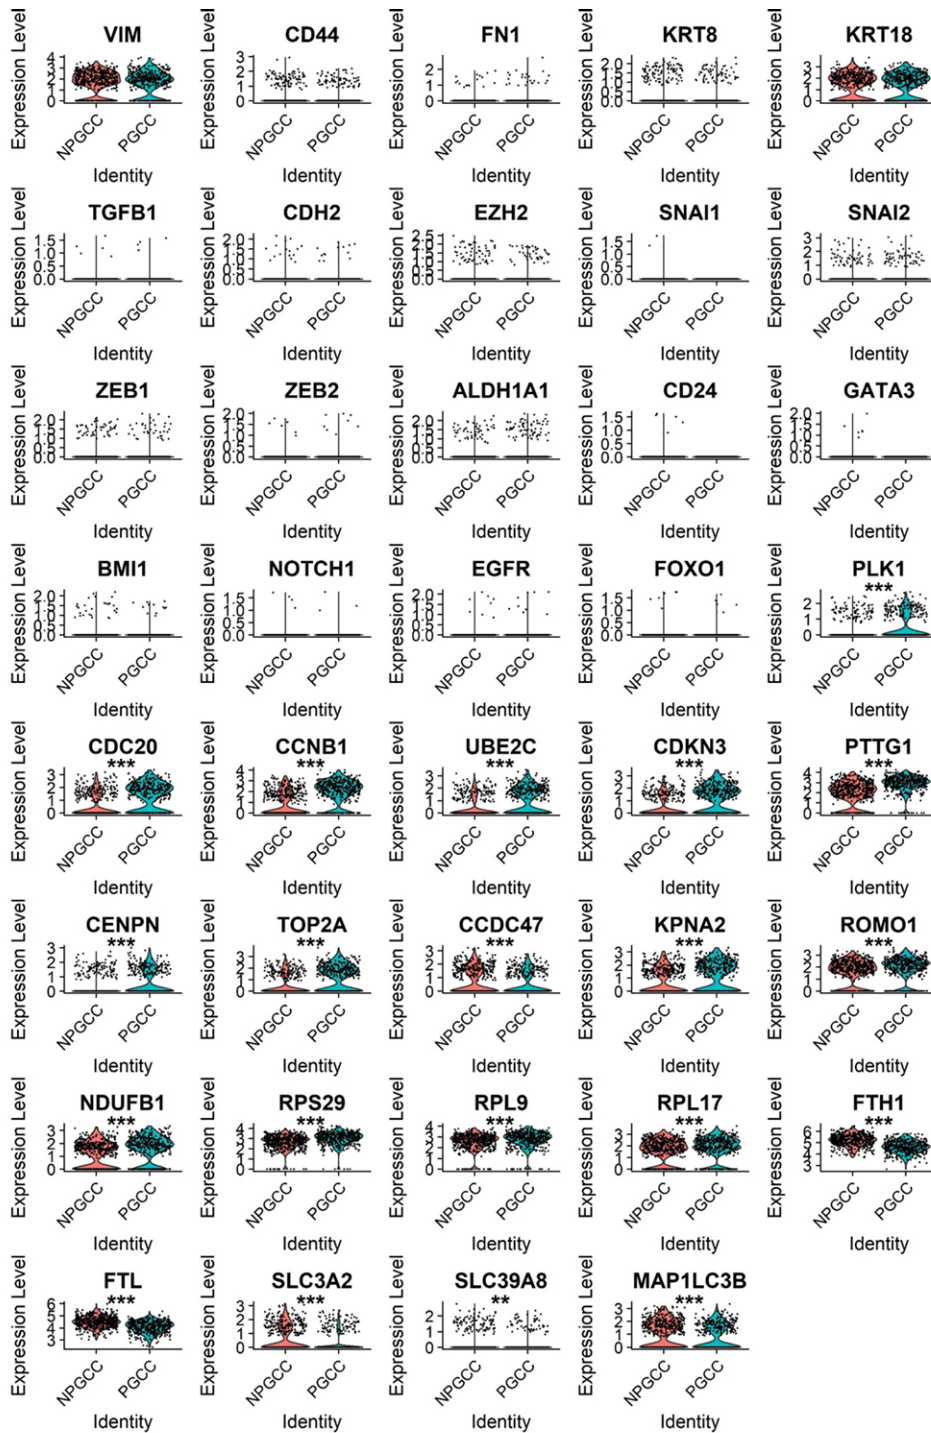

206

207 **Supplementary Figure 19.** Violin plots of Docetaxel treated SUM159 PGCCs and non-  
 208 PGCCs cells with statistical test. Y-axis represents gene expression with logarithmic scale.  
 209 Each dot represents one cell. \* refers to  $P < 0.05$ . \*\* refers to  $P < 0.01$ , and \*\*\* refers to  
 210  $P < 0.001$ .

211

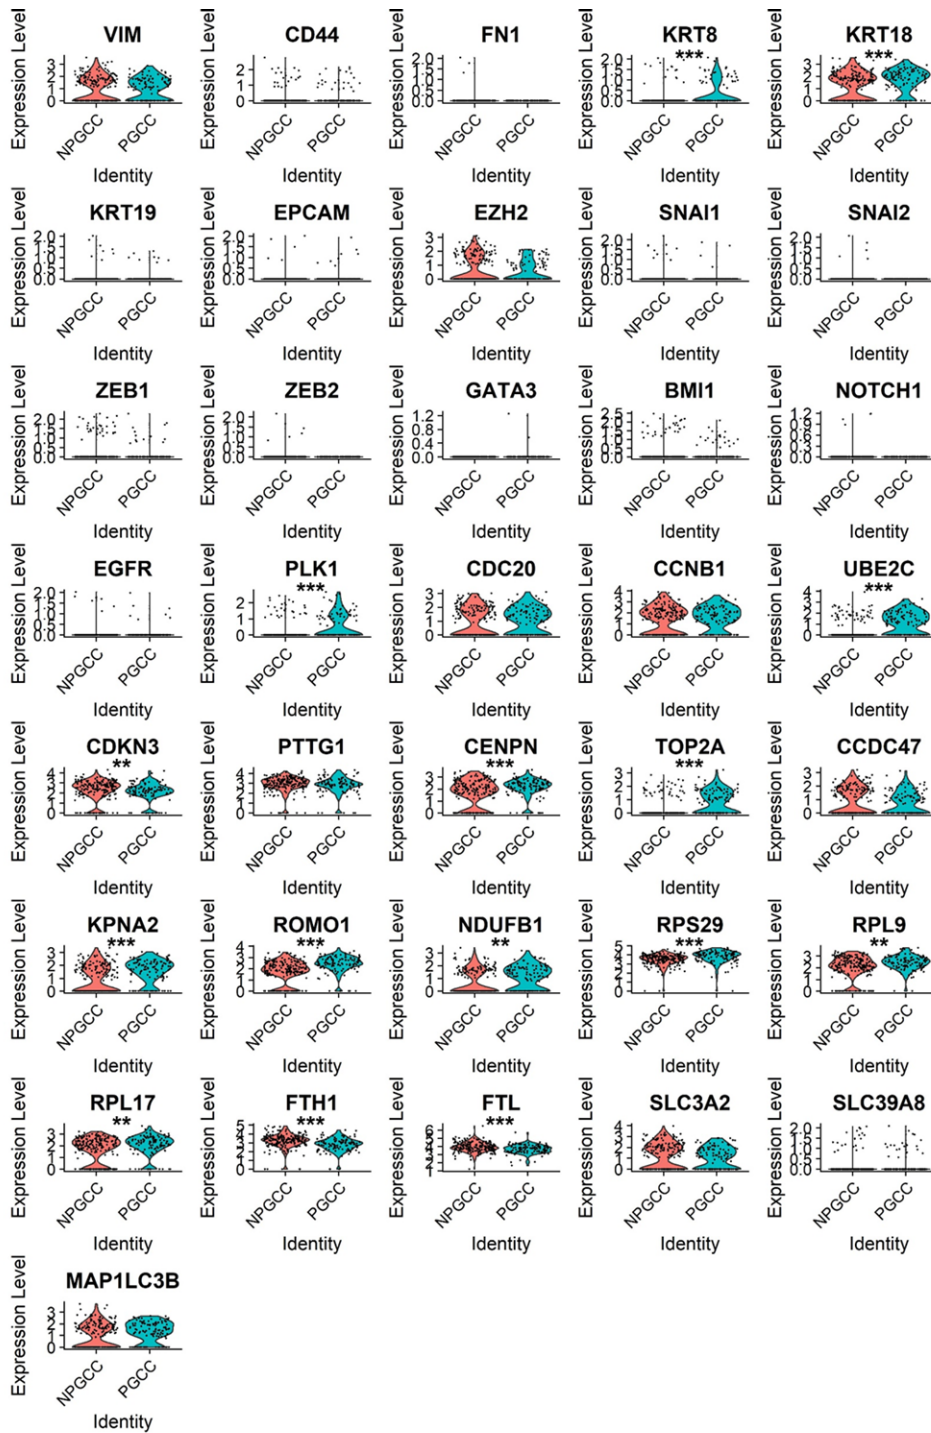

212

213 **Supplementary Figure 20.** Violin plots of Docetaxel treated MDA-MB-231 PGCCs and  
 214 non-PGCCs cells with statistical test. Y-axis represents gene expression with logarithmic  
 215 scale. Each dot represents one cell. \* refers to  $P < 0.05$ . \*\* refers to  $P < 0.01$ , and \*\*\*  
 216 refers to  $P < 0.001$ .

217

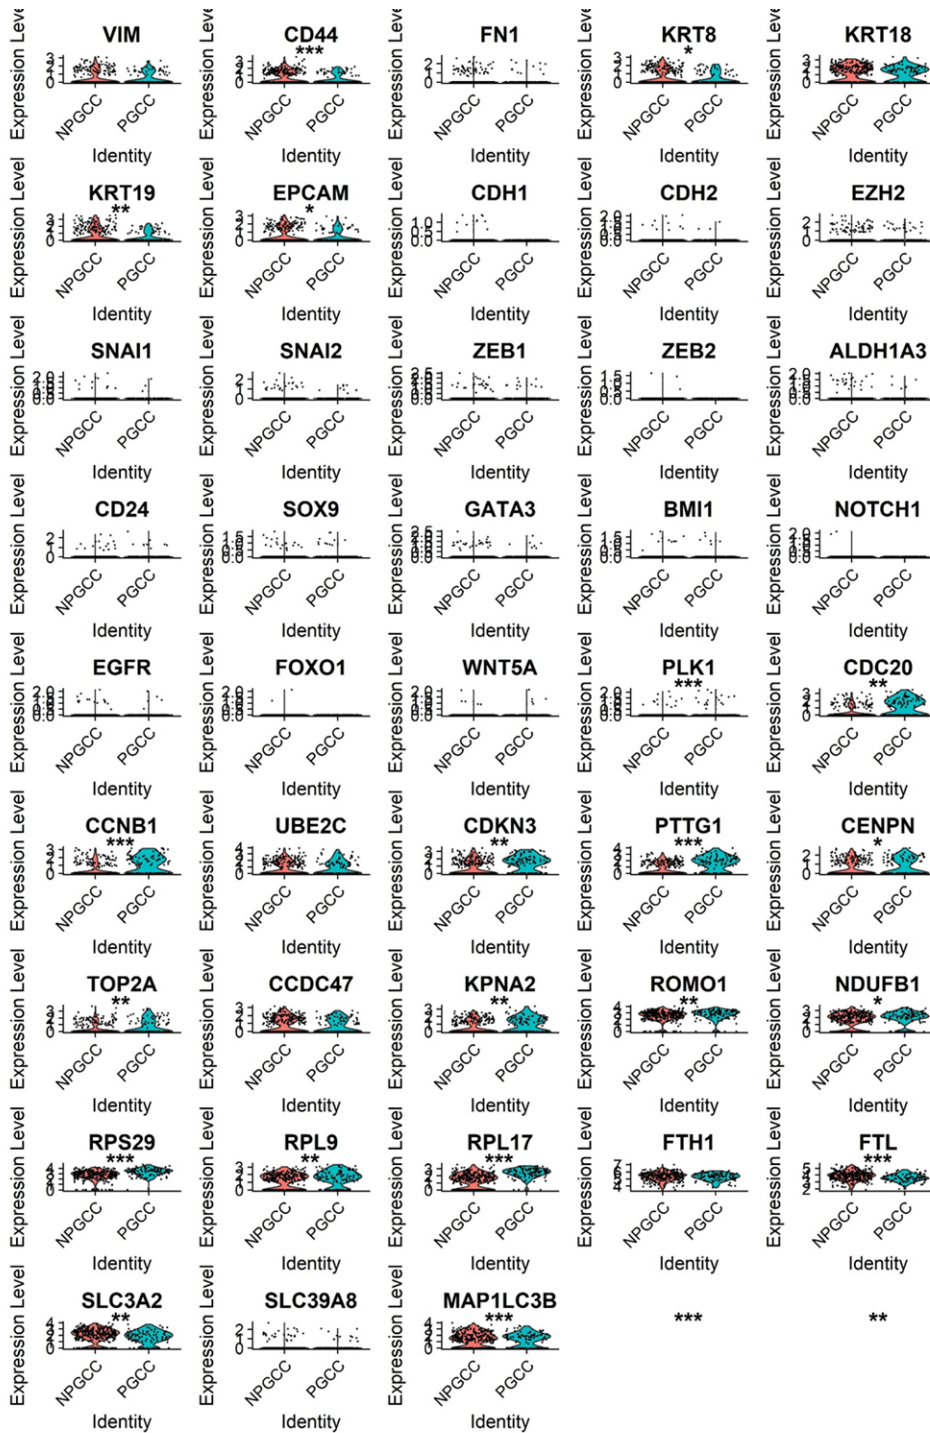

218

219 **Supplementary Figure 21.** Violin plots of Docetaxel treated and non-treated NPGCC and PGCC cells with statistical test. Y-axis represents gene expression with logarithmic scale.  
 220  
 221 Each dot represents one cell. \* refers to  $P < 0.05$ . \*\* refers to  $P < 0.01$ , and \*\*\* refers to  
 222  $P < 0.001$ .

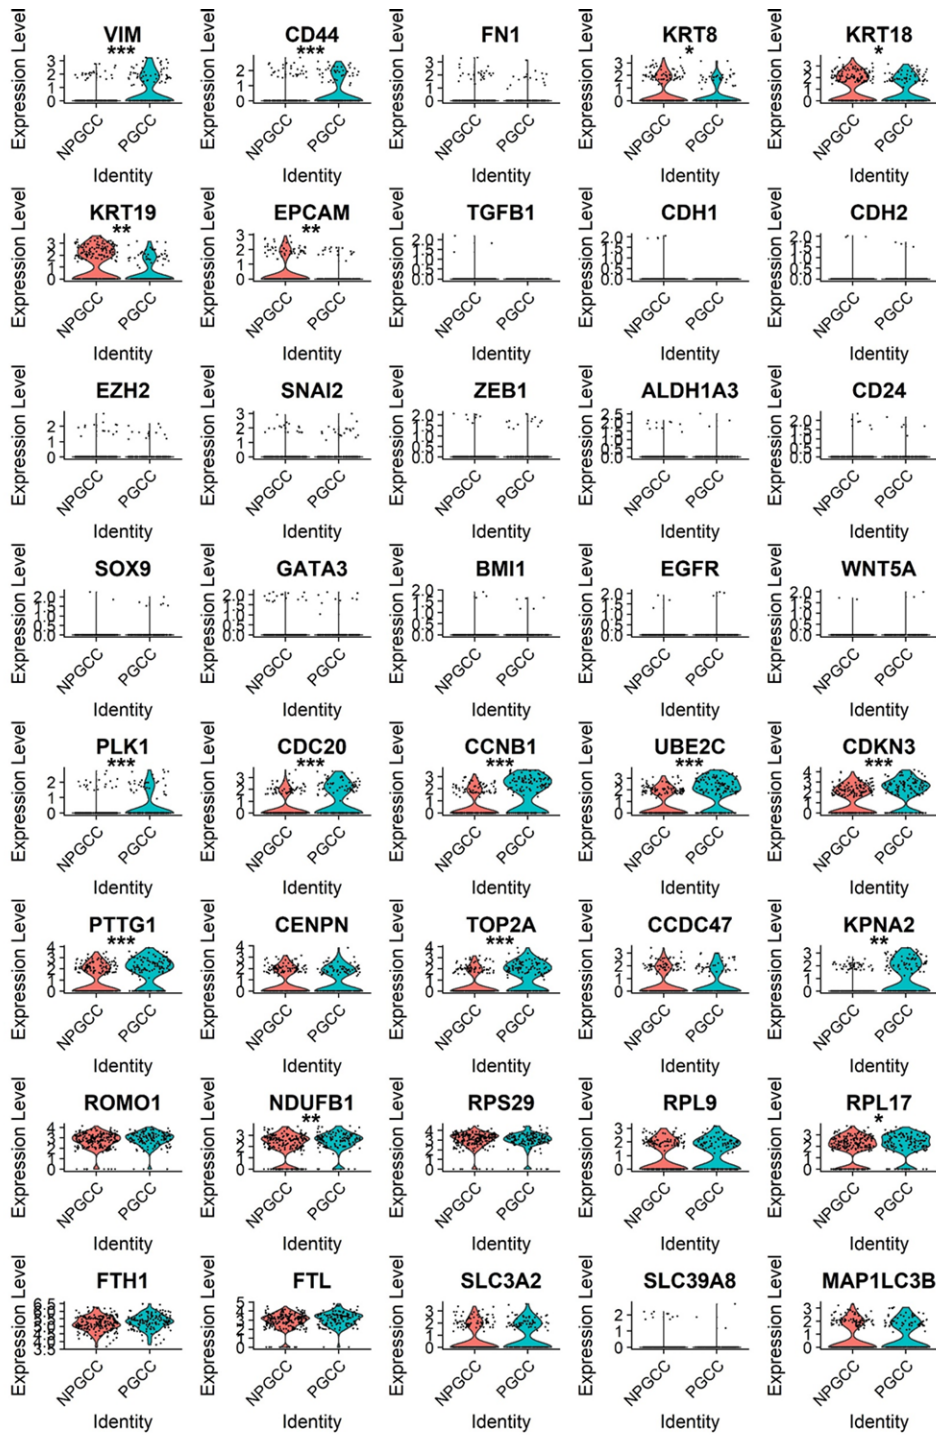

223

224 **Supplementary Figure 22.** Violin plots of untreated Vari068 PGCCs and non-PGCCs  
 225 cells with statistical test. Y-axis represents gene expression with logarithmic scale. Each  
 226 dot represents one cell. \* refers to  $P < 0.05$ . \*\* refers to  $P < 0.01$ , and \*\*\* refers to  $P <$   
 227  $0.001$ .

228



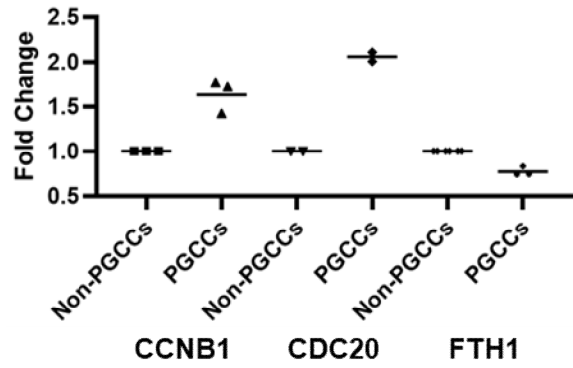

229

230 **Supplementary Figure 23. Validation of gene expression.** Bar graph shows qRT-PCR  
 231 analysis of CCNB1, CDC20, FTH1 expression in Docetaxel induced SUM159 non-  
 232 PGCCs and PGCCs. N = 2 for CDC20, and N = 3 for CCNB1 and FTH1.

233

234

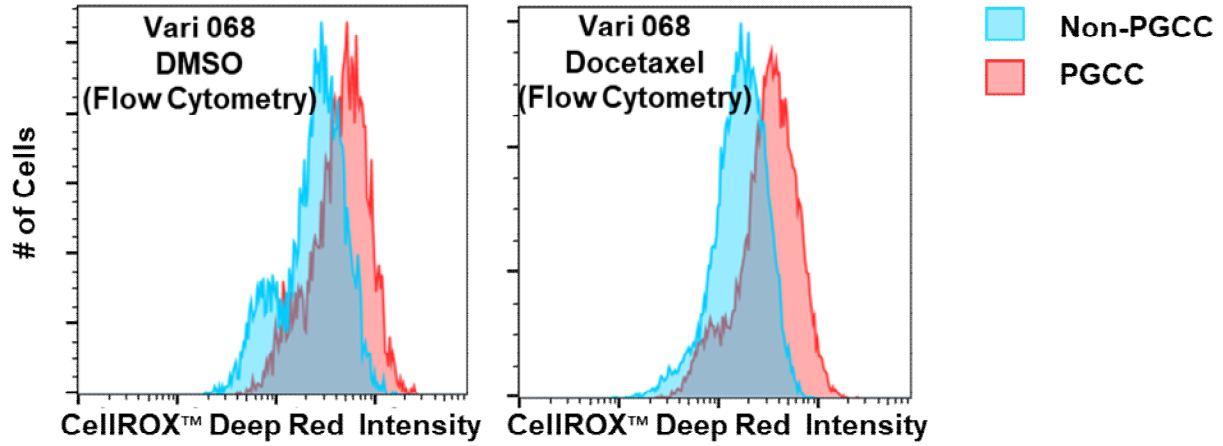

235

236 **Supplementary Figure 24. ROS level of PGCC and non-PGCC groups.** Flow  
237 cytometry experiments using Vari068 were performed. PGCCs were found to have  
238 significantly higher ROS level with and without the treatment of Docetaxel.

239

240

241

242

243

244  
245  
246  
247  
248  
249  
250  
251  
252  
253  
254  
255  
256  
257  
258  
259  
260  
261  
262  
263  
264  
265  
266  
267  
268  
269  
270  
271  
272  
273  
274  
275

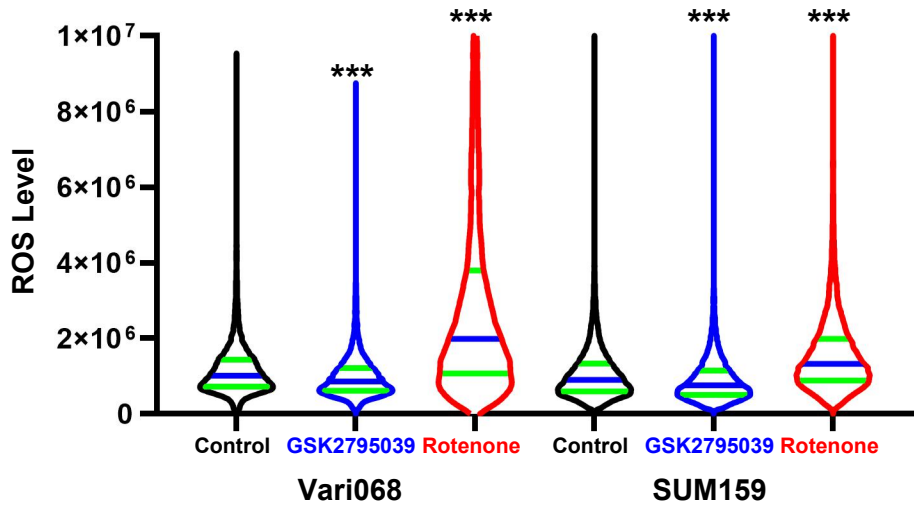

**Supplementary Figure 25. ROS level altered with ROS regulators treatment.** ROS level of Rotenone groups are higher than DMSO control groups and ROS level of GSK2795039 groups are lower than DMSO control groups both for Vari068 and SUM159. (n = 16,171 cells for Vari068 control, 9,330 cells for Vari068 GSK2795039, 10,119 cells for Vari068 Rotenone and 31,701 cells for SUM159 control, 30,686 cells for SUM159 GSK2795039, 22,699 cells for SUM159 Rotenone) Black curves in violin plot indicate DMSO control, blue curves indicate GSK2795039 treatment, red curves indicate Rotenone treatment. Green lines mean quartiles and blue lines mean median of all cells.

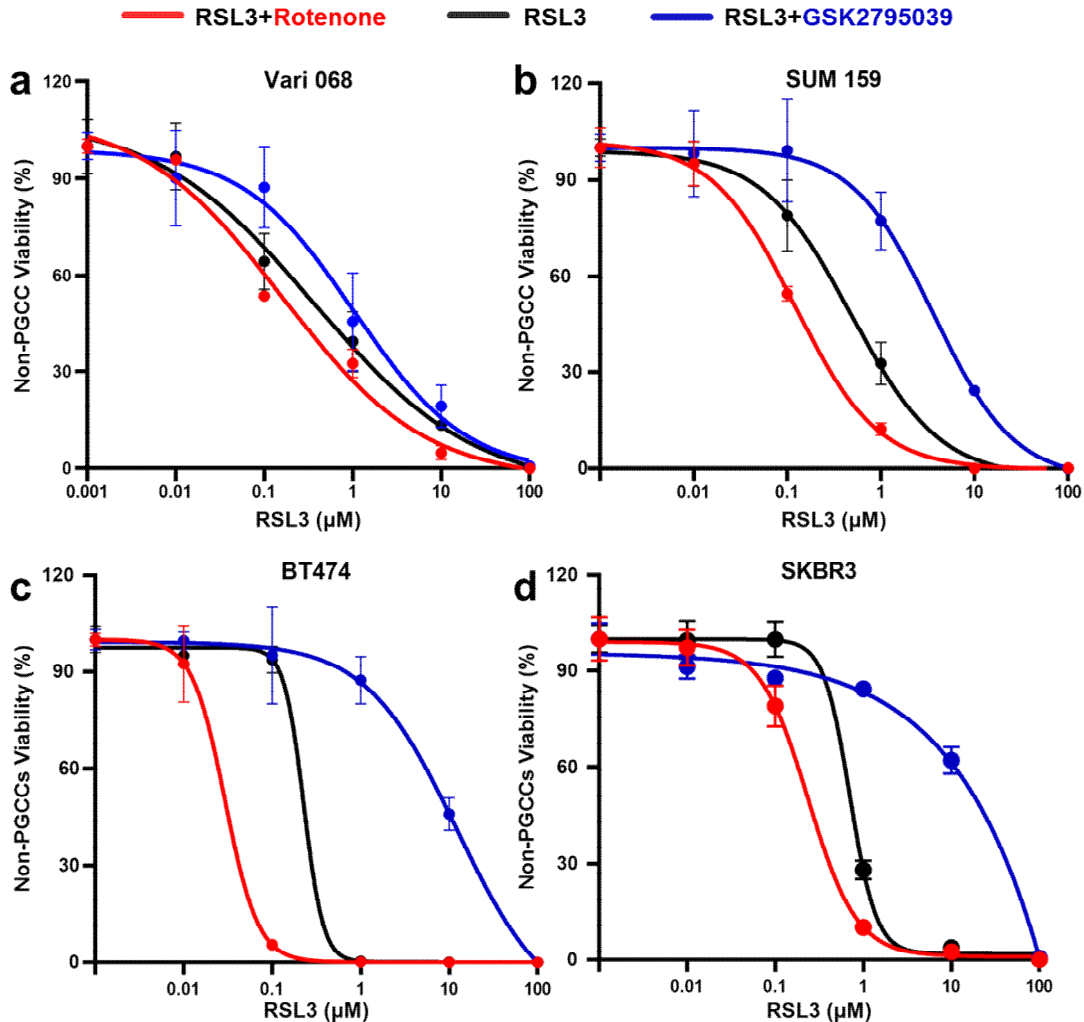

276

277 **Supplementary Figure 26. Rescue and sensitize non-PGCCs to ferroptosis by**  
 278 **altering ROS.** 1 μM of Docetaxel was treated 24 h for Vari 068 and SUM 159 cell and 1  
 279 μM of Alisertib was treated 24 h for BT474 and SKBR3 cell lines. Rotenone (10 μM for  
 280 Vari068 and SKBR3, 300 nM for SUM159, 3 μM for BT474) was selected to boost ROS  
 281 and GSK2795039 (40 μM for Vari068, BT474, and SKBR3, 100 μM for SUM159) to  
 282 reduce ROS. Compounds efficacy IC50 curves of RSL3 (from 100 μM to 0.001 μM)  
 283 alone (black), RSL3 with Rotenone (red), and RSL3 with GSK2795039 (blue) were  
 284 tested for comparison. IC50 values are provided in Supplementary Table 24. Error bars  
 285 indicate standard error of the mean (SEM). N = 3.

286

287

288 **Supplementary Table 1. Molecular information, basic medium and subtype of cell**  
 289 **lines in this study.**

| <b>Cell lines</b> | <b>ER</b> | <b>PR</b> | <b>HER2</b> | <b>Subtype</b> | <b>Base Medium</b> |
|-------------------|-----------|-----------|-------------|----------------|--------------------|
| VARI 068          | -         | -         | -           | TNBC           | DMEM               |
| SUM 149           | -         | -         | -           | TNBC           | Ham's F12          |
| SUM 159           | -         | -         | -           | TNBC           | Ham's F12          |
| MDA MB 231        | -         | -         | -           | TNBC           | DMEM               |
| MDA MB 436        | -         | -         | -           | TNBC           | DMEM               |
| MDA MB 468        | -         | -         | -           | TNBC           | DMEM               |
| T47D              | +         | +         | -           | Luminal<br>A   | RPMI               |
| BT474             | +         | +         | +           | Luminal<br>B   | DMEM               |
| SKBR3             | -         | -         | +           | HER2           | RPMI               |

290  
 291  
 292  
 293  
 294  
 295  
 296  
 297  
 298  
 299  
 300  
 301  
 302  
 303  
 304  
 305  
 306  
 307  
 308

309 **Supplementary Table 2 Inhibition statistical results for multi cell lines' PGCCs**  
 310 **induced by Docetaxel.**

| Cell lines    | # of PGCCs |                  |               |              |                 |                 |
|---------------|------------|------------------|---------------|--------------|-----------------|-----------------|
|               | DMSO       | Docetaxel        | Bortezomib    | Carfilzomib  | RSL3            | ML162           |
| VARI 068      | 327        | 384              | 80            | 61           | 2               | 1               |
| SUM 149       | 27         | 18               | 3             | 0            | 0               | 0               |
| SUM 159       | 164        | 267              | 24            | 28           | 0               | 0               |
| MDA MB<br>231 | 110        | 116              | 62            | 54           | 3               | 4               |
| MDA MB<br>436 | 6          | 3                | 3             | 3            | 0               | 0               |
| MDA MB<br>468 | 12         | 6                | 6             | 1            | 0               | 0               |
| T47D          | 21         | 28               | 1             | 6            | 0               | 0               |
| BT474         | 12         | 26               | 3             | 4            | 0               | 2               |
| SKBR3         | 47         | 17               | 30            | 32           | 1               | 2               |
| Mean          | 80.67      | 96.11            | 23.56         | 21           | 0.6667          | 1               |
| 95% CI        |            | -72.41,<br>41.52 | 0.1482, 114.1 | 2.704, 116.6 | 23.04,<br>137.0 | 22.70,<br>136.6 |
| P Value       |            | 0.5868           | <0.05         | <0.05        | <0.05           | <0.05           |

311

312

313

314 **Supplementary Table 3 Inhibition statistical results for multi cell lines' PGCCs**  
 315 **induced by Paclitaxel.**

| Cell lines    | # of PGCCs |                  |              |              |                 |                 |
|---------------|------------|------------------|--------------|--------------|-----------------|-----------------|
|               | DMSO       | Docetaxel        | Bortezomib   | Carfilzomib  | RSL3            | ML162           |
| VARI 068      | 349        | 396              | 45           | 38           | 2               | 0               |
| SUM 149       | 42         | 17               | 3            | 1            | 0               | 0               |
| SUM 159       | 117        | 97               | 5            | 4            | 0               | 0               |
| MDA MB<br>231 | 63         | 40               | 20           | 31           | 1               | 3               |
| MDA MB<br>436 | 19         | 12               | 7            | 5            | 0               | 0               |
| MDA MB<br>468 | 11         | 5                | 1            | 1            | 0               | 0               |
| T47D          | 12         | 16               | 0            | 3            | 0               | 0               |
| BT474         | 18         | 13               | 4            | 4            | 1               | 4               |
| SKBR3         | 29         | 14               | 55           | 32           | 1               | 0               |
| Mean          | 73.33      | 67.78            | 15.56        | 13.22        | 0.5556          | 0.7778          |
| 95% CI        |            | -50.78,<br>61.89 | 1.446, 114.1 | 3.779, 116.4 | 16.45,<br>129.1 | 16.22,<br>128.9 |
| P Value       |            | 0.843            | <0.05        | <0.05        | <0.05           | <0.05           |

316

317

318 **Supplementary Table 4 Inhibition statistical results for multi cell lines' PGCCs**  
 319 **induced by Alisertib.**

| Cell lines    | # of PGCCs |                  |              |              |                 |                 |
|---------------|------------|------------------|--------------|--------------|-----------------|-----------------|
|               | DMSO       | Docetaxel        | Bortezomib   | Carfilzomib  | RSL3            | ML162           |
| VARI 068      | 357        | 513              | 307          | 165          | 3               | 1               |
| SUM 149       | 530        | 467              | 13           | 23           | 0               | 0               |
| SUM 159       | 576        | 339              | 67           | 93           | 20              | 9               |
| MDA MB<br>231 | 694        | 686              | 164          | 119          | 85              | 14              |
| MDA MB<br>436 | 13         | 19               | 11           | 27           | 1               | 1               |
| MDA MB<br>468 | 19         | 13               | 2            | 9            | 0               | 0               |
| T47D          | 59         | 197              | 10           | 10           | 0               | 0               |
| BT474         | 140        | 73               | 18           | 97           | 2               | 0               |
| SKBR3         | 174        | 108              | 185          | 108          | 0               | 0               |
| Mean          | 284.7      | 268.3            | 86.33        | 72.33        | 12.33           | 2.778           |
| 95% CI        |            | -105.3,<br>137.9 | 76.73, 319.9 | 90.73, 333.9 | 150.7,<br>393.9 | 160.3,<br>403.5 |
| P Value       |            | 0.7874           | <0.05        | <0.05        | <0.05           | <0.05           |

320

321

322

323



324 **Supplementary Table 5 Inhibition statistical results for multi cell lines' PGCCs**  
 325 **induced by Tozasertib.**

| Cell lines    | # of PGCCs |                  |              |              |                 |                 |
|---------------|------------|------------------|--------------|--------------|-----------------|-----------------|
|               | DMSO       | Docetaxel        | Bortezomib   | Carfilzomib  | RSL3            | ML162           |
| VARI 068      | 619        | 636              | 325          | 193          | 7               | 1               |
| SUM 149       | 423        | 486              | 27           | 21           | 2               | 0               |
| SUM 159       | 529        | 215              | 46           | 78           | 116             | 6               |
| MDA MB<br>231 | 681        | 672              | 107          | 80           | 156             | 35              |
| MDA MB<br>436 | 19         | 11               | 11           | 8            | 1               | 0               |
| MDA MB<br>468 | 16         | 9                | 6            | 2            | 0               | 0               |
| T47D          | 64         | 78               | 6            | 2            | 0               | 0               |
| BT474         | 238        | 155              | 17           | 45           | 10              | 3               |
| SKBR3         | 224        | 121              | 150          | 96           | 0               | 5               |
| Mean          | 312.6      | 264.8            | 77.22        | 58.33        | 32.44           | 5.556           |
| 95% CI        |            | -72.84,<br>168.4 | 114.7, 355.9 | 133.6, 374.8 | 159.5,<br>400.7 | 186.4,<br>427.6 |
| P Value       |            | 0.4281           | <0.05        | <0.05        | <0.05           | <0.05           |

326

327

328 **Supplementary Table 6 Inhibition statistical results for multi cell lines' non-**  
 329 **PGCCs with Docetaxel treatment.**

| Cell lines    | # of Non-PGCCs |              |              |              |               |                 |
|---------------|----------------|--------------|--------------|--------------|---------------|-----------------|
|               | DMSO           | Docetaxel    | Bortezomib   | Carfilzomib  | RSL3          | ML162           |
| VARI 068      | 579            | 637          | 233          | 184          | 16            | 18              |
| SUM 149       | 14             | 19           | 3            | 3            | 0             | 0               |
| SUM 159       | 115            | 79           | 65           | 74           | 7             | 10              |
| MDA MB<br>231 | 124            | 161          | 75           | 59           | 8             | 14              |
| MDA MB<br>436 | 31             | 30           | 24           | 20           | 3             | 1               |
| MDA MB<br>468 | 31             | 13           | 7            | 6            | 0             | 0               |
| T47D          | 571            | 460          | 278          | 224          | 27            | 34              |
| BT474         | 178            | 123          | 131          | 130          | 43            | 31              |
| SKBR3         | 171            | 216          | 128          | 139          | 153           | 128             |
| Mean          | 201.6          | 193.1        | 104.9        | 93.22        | 28.56         | 26.22           |
| 95% CI        |                | -86.6, 103.5 | 1.624, 191.7 | 13.29, 203.4 | 77.96,<br>268 | 80.29,<br>270.4 |
| P Value       |                | 0.8584       | 0.0464       | 0.0265       | 0.0007        | 0.0006          |

330

331

332

333 **Supplementary Table 7 Inhibition statistical results for multi cell lines' non-**  
 334 **PGCCs with Paclitaxel treatment.**

| Cell lines    | # of Non-PGCCs |              |              |             |                 |                 |
|---------------|----------------|--------------|--------------|-------------|-----------------|-----------------|
|               | DMSO           | Docetaxel    | Bortezomib   | Carfilzomib | RSL3            | ML162           |
| VARI 068      | 540            | 598          | 345          | 339         | 8               | 30              |
| SUM 149       | 101            | 17           | 10           | 23          | 0               | 0               |
| SUM 159       | 100            | 93           | 28           | 16          | 7               | 2               |
| MDA MB<br>231 | 185            | 117          | 121          | 115         | 4               | 5               |
| MDA MB<br>436 | 44             | 43           | 39           | 28          | 1               | 1               |
| MDA MB<br>468 | 23             | 23           | 13           | 12          | 0               | 0               |
| T47D          | 601            | 449          | 353          | 364         | 43              | 29              |
| BT474         | 221            | 246          | 167          | 129         | 25              | 28              |
| SKBR3         | 259            | 233          | 129          | 180         | 182             | 50              |
| Mean          | 230.4          | 202.1        | 133.9        | 134         | 30              | 16.11           |
| 95% CI        |                | -59.7, 116.4 | 8.521, 184.6 | 8.41, 184.5 | 112.4,<br>288.5 | 126.3,<br>302.4 |
| P Value       |                | 0.5191       | 0.0324       | 0.0326      | <0.0001         | <0.0001         |

335

336

337 **Supplementary Table 8 Inhibition statistical results for multi cell lines' non-**  
 338 **PGCCs with Alisertib treatment.**

| Cell lines    | # of Non-PGCCs |                 |            |              |                |              |
|---------------|----------------|-----------------|------------|--------------|----------------|--------------|
|               | DMSO           | Docetaxel       | Bortezomib | Carfilzomib  | RSL3           | ML162        |
| VARI 068      | 822            | 658             | 508        | 511          | 19             | 18           |
| SUM 149       | 1210           | 289             | 30         | 58           | 0              | 1            |
| SUM 159       | 1461           | 180             | 31         | 55           | 53             | 48           |
| MDA MB<br>231 | 1201           | 402             | 238        | 136          | 69             | 54           |
| MDA MB<br>436 | 51             | 37              | 86         | 28           | 8              | 2            |
| MDA MB<br>468 | 24             | 27              | 15         | 6            | 1              | 0            |
| T47D          | 1223           | 541             | 673        | 814          | 21             | 9            |
| BT474         | 1029           | 873             | 858        | 797          | 91             | 49           |
| SKBR3         | 923            | 550             | 643        | 512          | 128            | 30           |
| Mean          | 882.7          | 395.2           | 342.4      | 324.1        | 43.33          | 23.44        |
| 95% CI        |                | 250.2,<br>724.7 | 303, 777.5 | 321.3, 795.8 | 602.1,<br>1077 | 622,<br>1096 |
| P Value       |                | 0.0002          | <0.0001    | <0.0001      | <0.0001        | <0.0001      |

339

340

341

342 **Supplementary Table 9 Inhibition statistical results for multi cell lines' non-**  
 343 **PGCCs with Tozasertib treatment.**

| Cell lines    | # of Non-PGCCs |                 |              |              |                 |                 |
|---------------|----------------|-----------------|--------------|--------------|-----------------|-----------------|
|               | DMSO           | Docetaxel       | Bortezomib   | Carfilzomib  | RSL3            | ML162           |
| VARI 068      | 769            | 612             | 455          | 445          | 27              | 24              |
| SUM 149       | 1062           | 309             | 36           | 36           | 1               | 1               |
| SUM 159       | 1794           | 136             | 23           | 29           | 68              | 71              |
| MDA MB<br>231 | 271            | 491             | 104          | 86           | 44              | 58              |
| MDA MB<br>436 | 47             | 38              | 56           | 72           | 0               | 1               |
| MDA MB<br>468 | 27             | 36              | 13           | 20           | 2               | 1               |
| T47D          | 1023           | 603             | 544          | 728          | 19              | 10              |
| BT474         | 685            | 772             | 623          | 686          | 78              | 67              |
| SKBR3         | 680            | 504             | 723          | 565          | 140             | 179             |
| Mean          | 706.4          | 389             | 286.3        | 296.3        | 42.11           | 45.78           |
| 95% CI        |                | 60.72,<br>574.2 | 163.4, 676.8 | 153.4, 666.8 | 407.6,<br>921.1 | 403.9,<br>917.4 |
| P Value       |                | 0.0167          | 0.002        | 0.0025       | <0.0001         | <0.0001         |

344

345

346 **Supplementary Table 10 Inhibition statistical results for multi cell lines' PGCCs**  
 347 **induced by Cabazitaxel.**

| Cell lines    | # of PGCCs |                  |              |              |                 |                 |
|---------------|------------|------------------|--------------|--------------|-----------------|-----------------|
|               | DMSO       | Docetaxel        | Bortezomib   | Carfilzomib  | RSL3            | ML162           |
| VARI 068      | 330        | 354              | 179          | 72           | 1               | 1               |
| SUM 149       | 144        | 124              | 5            | 14           | 0               | 0               |
| SUM 159       | 115        | 151              | 27           | 36           | 0               | 0               |
| MDA MB<br>231 | 75         | 74               | 58           | 41           | 2               | 3               |
| MDA MB<br>436 | 7          | 15               | 6            | 6            | 0               | 0               |
| MDA MB<br>468 | 6          | 2                | 0            | 0            | 0               | 0               |
| T47D          | 22         | 28               | 1            | 1            | 0               | 0               |
| BT474         | 10         | 23               | 7            | 4            | 4               | 1               |
| SKBR3         | 224        | 121              | 150          | 96           | 0               | 5               |
| Mean          | 88.63      | 96.38            | 22.88        | 21.75        | 0.875           | 0.625           |
| 95% CI        |            | -63.19,<br>47.69 | 10.31, 121.2 | 11.44, 122.3 | 32.31,<br>143.2 | 32.56,<br>143.4 |
| P Value       |            | 0.7782           | <0.05        | <0.05        | <0.05           | <0.05           |

348

349

350

351 **Supplementary Table 11 Inhibition statistical results for multi cell lines' non-**  
 352 **PGCCs with Cabazitaxel treatment.**

| Cell lines    | # of Non-PGCCs |              |              |             |                 |               |
|---------------|----------------|--------------|--------------|-------------|-----------------|---------------|
|               | DMSO           | Docetaxel    | Bortezomib   | Carfilzomib | RSL3            | ML162         |
| VARI 068      | 576            | 637          | 373          | 365         | 15              | 48            |
| SUM 149       | 111            | 122          | 20           | 28          | 0               | 0             |
| SUM 159       | 112            | 102          | 28           | 31          | 7               | 8             |
| MDA MB<br>231 | 215            | 142          | 98           | 110         | 6               | 14            |
| MDA MB<br>436 | 33             | 39           | 23           | 22          | 2               | 0             |
| MDA MB<br>468 | 27             | 15           | 13           | 8           | 0               | 0             |
| T47D          | 579            | 639          | 381          | 396         | 40              | 21            |
| BT474         | 270            | 213          | 180          | 160         | 48              | 35            |
| SKBR3         | 244            | 229          | 163          | 171         | 177             | 166           |
| Mean          | 240.8          | 237.6        | 142.1        | 143.4       | 32.78           | 32.44         |
| 95% CI        |                | -92.45, 98.9 | 2.991, 194.3 | 1.657, 193  | 112.3,<br>303.7 | 112.7,<br>304 |
| P Value       |                | 0.9461       | 0.0436       | 0.0463      | <0.0001         | <0.0001       |

353

354

355

356  
357

**Supplementary Table 12 Inhibition statistical results for multi cell lines' PGCCs with Cabazitaxel treatment.**

| Treatment            | # of PGCCs  |            |            |                  | Mean  | 95% CI        | P Value |
|----------------------|-------------|------------|------------|------------------|-------|---------------|---------|
|                      | VARI<br>068 | SUM<br>149 | SUM<br>159 | MDA<br>MB<br>231 |       |               |         |
| DMSO                 | 210         | 33         | 93         | 173              | 127.3 |               |         |
| Docetaxel            | 246         | 22         | 170        | 182              | 155.3 | -68.11, 12.09 | 0.1485  |
| Vorinostat<br>(SAHA) | 170         | 13         | 49         | 93               | 81.25 | 5.902, 86.1   | 0.029   |
| Romidepsin           | 178         | 5          | 37         | 85               | 76.25 | 10.9, 91.1    | 0.0183  |

358  
359  
360  
361  
362



363 **Supplementary Table 13 Inhibition statistical results for multi cell lines' non-**  
 364 **PGCCs with Cabazitaxel treatment.**

| Treatment            | # of Non-PGCCs |            |            |                  | Mean  | 95% CI        | P Value |
|----------------------|----------------|------------|------------|------------------|-------|---------------|---------|
|                      | VARI<br>068    | SUM<br>149 | SUM<br>159 | MDA<br>MB<br>231 |       |               |         |
| DMSO                 | 503            | 77         | 105        | 368              | 263.3 |               |         |
| Docetaxel            | 905            | 104        | 72         | 477              | 389.5 | -289.3, 36.79 | 0.1137  |
| Vorinostat<br>(SAHA) | 432            | 14         | 80         | 260              | 196.5 | -96.29,229.8  | 0.3785  |
| Romidepsin           | 447            | 16         | 91         | 276              | 207.5 | -107.3,218.8  | 0.459   |

365  
 366  
 367  
 368  
 369  
 370  
 371  
 372  
 373  
 374

375 **Supplementary Table 14 Inhibition statistical results for multi cell lines' PGCCs**  
 376 **with Cabazitaxel treatment.**

| Treatment            | # of PGCCs  |            |            |                  | Mean  | 95% CI        | P Value |
|----------------------|-------------|------------|------------|------------------|-------|---------------|---------|
|                      | VARI<br>068 | SUM<br>149 | SUM<br>159 | MDA<br>MB<br>231 |       |               |         |
| DMSO                 | 246         | 34         | 96         | 186              | 140.5 |               |         |
| Docetaxel            | 292         | 20         | 63         | 129              | 125.9 | -35.72, 64.84 | 0.5288  |
| Vorinostat<br>(SAHA) | 156         | 11         | 41         | 91               | 74.75 | 15.47, 116    | 0.016   |
| Romidepsin           | 141         | 8          | 38         | 89               | 69    | 21.22, 121.8  | 0.0105  |

377

378

379

380

381

382 **Supplementary Table 15 Inhibition statistical results for multi cell lines' non-**  
 383 **PGCCs with Cabazitaxel treatment.**

| Treatment            | # of Non-PGCCs |            |            |                  | Mean  | 95% CI        | P Value |
|----------------------|----------------|------------|------------|------------------|-------|---------------|---------|
|                      | VARI<br>068    | SUM<br>149 | SUM<br>159 | MDA<br>MB<br>231 |       |               |         |
| DMSO                 | 428            | 51         | 162        | 225              | 216.5 |               |         |
| Docetaxel            | 510            | 21         | 134        | 135              | 200   | -50.98, 83.88 | 0.5944  |
| Vorinostat<br>(SAHA) | 328            | 27         | 97         | 135              | 146.8 | 2.32, 137.2   | 0.044   |
| Romidepsin           | 342            | 23         | 103        | 125              | 148.3 | 0.8202, 135.7 | 0.0478  |

384

385

386

387 **Supplementary Table 16 Inhibition statistical results for multi cell lines' PGCCs**  
 388 **with Cabazitaxel treatment.**

| Treatment            | # of PGCCs  |            |            |                  | Mean  | 95% CI        | P Value |
|----------------------|-------------|------------|------------|------------------|-------|---------------|---------|
|                      | VARI<br>068 | SUM<br>149 | SUM<br>159 | MDA<br>MB<br>231 |       |               |         |
| DMSO                 | 251         | 49         | 161        | 95               | 139   |               |         |
| Docetaxel            | 278         | 54         | 147        | 158              | 159   | -63.18, 23.28 | 0.3237  |
| Vorinostat<br>(SAHA) | 165         | 34         | 71         | 58               | 82    | 13.77, 100.2  | 0.0154  |
| Romidepsin           | 140         | 24         | 36         | 27               | 56.75 | 39.02, 125.5  | 0.002   |

389

390

391

392

393

394 **Supplementary Table 17 Inhibition statistical results for multi cell lines' non-**  
 395 **PGCCs with Cabazitaxel treatment.**

| Treatment            | # of Non-PGCCs |            |            |                  | Mean  | 95% CI       | P Value |
|----------------------|----------------|------------|------------|------------------|-------|--------------|---------|
|                      | VARI<br>068    | SUM<br>149 | SUM<br>159 | MDA<br>MB<br>231 |       |              |         |
| DMSO                 | 487            | 134        | 86         | 204              | 227.8 |              |         |
| Docetaxel            | 530            | 147        | 78         | 135              | 222.6 | -40, 50.34   | 0.8017  |
| Vorinostat<br>(SAHA) | 433            | 82         | 51         | 141              | 176.8 | 5.831, 96.17 | 0.031   |
| Romidepsin           | 414            | 32         | 62         | 123              | 157.8 | 24.83, 115.2 | 0.0067  |

396  
 397  
 398  
 399  
 400  
 401  
 402  
 403  
 404  
 405

406 **Supplementary Table 18 Inhibition statistical results for multi cell lines' PGCCs**  
 407 **with Cabazitaxel treatment.**

| Treatment            | # of PGCCs  |            |            |                  | Mean  | 95% CI       | P Value |
|----------------------|-------------|------------|------------|------------------|-------|--------------|---------|
|                      | VARI<br>068 | SUM<br>149 | SUM<br>159 | MDA<br>MB<br>231 |       |              |         |
| DMSO                 | 332         | 114        | 226        | 476              | 287   |              |         |
| Docetaxel            | 247         | 91         | 112        | 597              | 261.8 | -127.5, 178  | 0.7171  |
| Vorinostat<br>(SAHA) | 208         | 81         | 64         | 182              | 133.8 | 0.4952, 306  | 0.0494  |
| Romidepsin           | 231         | 72         | 43         | 179              | 131.3 | 2.995, 308.5 | 0.0465  |

408  
 409  
 410  
 411  
 412

413 **Supplementary Table 19 Inhibition statistical results for multi cell lines' non-**  
 414 **PGCCs with Cabazitaxel treatment.**

| Treatment            | # of Non-PGCCs |            |            |                  | Mean  | 95% CI       | P Value |
|----------------------|----------------|------------|------------|------------------|-------|--------------|---------|
|                      | VARI<br>068    | SUM<br>149 | SUM<br>159 | MDA<br>MB<br>231 |       |              |         |
| DMSO                 | 594            | 318        | 151        | 629              | 423   |              |         |
| Docetaxel            | 669            | 76         | 79         | 211              | 258.6 | 11.72, 317   | 0.0376  |
| Vorinostat<br>(SAHA) | 502            | 67         | 32         | 452              | 263.3 | 7.094, 312.4 | 0.0421  |
| Romidepsin           | 514            | 73         | 46         | 415              | 262   | 8.344, 313.7 | 0.0408  |

415

416

417

418

419

420

421

422 **Supplementary Table 20 Inhibition statistical results for multi cell lines' PGCCs**  
 423 **with Cabazitaxel treatment.**

| Treatment            | # of PGCCs  |            |            |                  | Mean  | 95% CI       | P Value |
|----------------------|-------------|------------|------------|------------------|-------|--------------|---------|
|                      | VARI<br>068 | SUM<br>149 | SUM<br>159 | MDA<br>MB<br>231 |       |              |         |
| DMSO                 | 412         | 181        | 161        | 358              | 278   |              |         |
| Docetaxel            | 537         | 73         | 203        | 227              | 260.1 | -83, 118.8   | 0.6975  |
| Vorinostat<br>(SAHA) | 280         | 79         | 76         | 212              | 161.8 | 15.34, 217.2 | 0.0285  |
| Romidepsin           | 266         | 84         | 57         | 207              | 153.5 | 23.59, 225.4 | 0.021   |

424

425

426

427

428



429 **Supplementary Table 21 Inhibition statistical results for multi cell lines' non-**  
 430 **PGCCs with Cabazitaxel treatment.**

| Treatment            | # of Non-PGCCs |            |            |                  | Mean  | 95% CI       | P Value |
|----------------------|----------------|------------|------------|------------------|-------|--------------|---------|
|                      | VARI<br>068    | SUM<br>149 | SUM<br>159 | MDA<br>MB<br>231 |       |              |         |
| DMSO                 | 635            | 281        | 176        | 480              | 393   |              |         |
| Docetaxel            | 451            | 68         | 53         | 502              | 268.5 | 5.688, 243.3 | 0.0419  |
| Vorinostat<br>(SAHA) | 512            | 78         | 84         | 254              | 232   | 42.19, 279.8 | 0.0135  |
| Romidepsin           | 498            | 72         | 50         | 202              | 205.5 | 68.69, 306.3 | 0.006   |

431

432

433

434

435

436 **Supplementary Table 22. Top-ranked altered pathways (KEGG 2021 Human**  
 437 **pathway database) of PGCCs versus non-PGCCs using breast cancer cell lines**  
 438 **(SUM159 and MDA-MB-231), patient-derived cells (Vari068), and the overlapping**  
 439 **markers between three cell lines.**

| <b>Overlapping Markers of Three Cell Lines</b> | <b>P-value</b> | <b>SUM159</b>                    | <b>P-value</b> |
|------------------------------------------------|----------------|----------------------------------|----------------|
| <b>Ribosome</b>                                | 1.91E-05       | <b>Oxidative phosphorylation</b> | 2.79E-09       |
| Coronavirus disease                            | 1.61E-04       | Parkinson disease                | 3.06E-09       |
| <b>Cell cycle</b>                              | 9.41E-04       | <b>Cell cycle</b>                | 7.13E-09       |
| <b>Oxidative phosphorylation</b>               | 1.22E-03       | <b>Ribosome</b>                  | 2.25E-07       |
| DNA replication                                | 7.05E-03       | Prion disease                    | 1.40E-06       |
| <b>Ferroptosis</b>                             | 9.07E-03       | p53 signaling pathway            | 2.80E-06       |
| Parkinson disease                              | 1.13E-02       | Amyotrophic lateral sclerosis    | 2.93E-06       |
| Nucleotide excision repair                     | 1.18E-02       | Oocyte meiosis                   | 3.25E-06       |
| Prion disease                                  | 1.54E-02       | RNA transport                    | 9.29E-06       |
| Spliceosome                                    | 1.57E-02       | Spliceosome                      | 1.70E-05       |
| Mineral absorption                             | 1.88E-02       | Huntington disease               | 2.71E-05       |
| Protein processing in endoplasmic reticulum    | 2.21E-02       | Alzheimer disease                | 3.76E-05       |
| Huntington disease                             | 2.24E-02       | Coronavirus disease              | 1.20E-04       |
| p53 signaling pathway                          | 2.71E-02       | Thermogenesis                    | 1.20E-04       |
| Riboflavin metabolism                          | 2.77E-02       | <b>Ferroptosis</b>               | 1.97E-04       |
| <b>MDA-MB-231</b>                              | <b>P-value</b> | <b>Vari068</b>                   | <b>P-value</b> |
| <b>Ribosome</b>                                | 3.03E-15       | <b>Ribosome</b>                  | 1.94E-14       |
| Spliceosome                                    | 1.05E-14       | Amyotrophic lateral sclerosis    | 1.52E-12       |

|                                             |          |                                             |          |
|---------------------------------------------|----------|---------------------------------------------|----------|
| Parkinson disease                           | 2.83E-12 | Parkinson disease                           | 3.68E-12 |
| Amyotrophic lateral sclerosis               | 3.33E-12 | Protein processing in endoplasmic reticulum | 7.18E-12 |
| Huntington disease                          | 1.08E-11 | Spliceosome                                 | 2.13E-09 |
| <b>Cell cycle</b>                           | 3.36E-11 | Pathways of neurodegeneration               | 1.27E-08 |
| Protein processing in endoplasmic reticulum | 3.70E-10 | <b>Oxidative phosphorylation</b>            | 7.89E-08 |
| <b>Oxidative phosphorylation</b>            | 1.09E-09 | Huntington disease                          | 1.55E-07 |
| RNA transport                               | 4.57E-09 | <b>Cell cycle</b>                           | 2.26E-07 |
| Prion disease                               | 2.38E-08 | Coronavirus disease                         | 2.97E-07 |
| Ubiquitin mediated proteolysis              | 2.45E-06 | Alzheimer disease                           | 3.14E-07 |
| Alzheimer disease                           | 6.41E-06 | Prion disease                               | 5.47E-07 |
| Diabetic cardiomyopathy                     | 9.95E-06 | Thermogenesis                               | 5.47E-06 |
| Thermogenesis                               | 1.17E-05 | RNA degradation                             | 4.45E-05 |
| Pathways of neurodegeneration               | 1.77E-05 | p53 signaling pathway                       | 5.85E-05 |

440

441

442 **Supplementary Table 23. Top-ranked altered pathways (KEGG 2021 Human**  
 443 **pathway database) of untreated PGCCs versus non-PGCCs of Vari068 breast**  
 444 **cancer cells.**

| <b>Vari068</b>                | <b>P-value</b> |
|-------------------------------|----------------|
| <b>Cell cycle</b>             | 1.99E-17       |
| <b>Ribosome</b>               | 4.29E-13       |
| Parkinson disease             | 1.10E-10       |
| Amyotrophic lateral sclerosis | 7.91E-10       |
| Huntington disease            | 1.98E-09       |
| Alzheimer disease             | 3.68E-09       |
| Prion disease                 | 6.21E-09       |
| Coronavirus disease           | 2.58E-08       |
| p53 signaling pathway         | 3.59E-08       |
| Pathways of neurodegeneration | 5.42E-08       |
| DNA replication               | 1.90E-07       |
| Spliceosome                   | 4.67E-06       |
| Oocyte meiosis                | 1.62E-05       |
| Pyruvate metabolism           | 2.80E-05       |
| Cellular senescence           | 2.88E-05       |

445

446

447

448

449 **Supplementary Table 24. Top-ranked altered pathways (NCI-Nature pathway**  
 450 **database) of PGCCs versus non-PGCCs using breast cancer cell lines (SUM159**  
 451 **and MDA-MB-231), patient-derived cells (Vari068), and the overlapping markers**  
 452 **between three cell lines.**

| <b>Overlapping Markers of Three Cell Lines</b>                    | <b>P-value</b> | <b>SUM159</b>                                         | <b>P-value</b> |
|-------------------------------------------------------------------|----------------|-------------------------------------------------------|----------------|
| p73 transcription factor network                                  | 1.61E-04       | <b>PLK1 signaling events</b>                          | 3.96E-07       |
| Validated transcriptional targets of TAp63 isoforms               | 8.49E-04       | <b>Aurora B signaling</b>                             | 1.21E-06       |
| E2F transcription factor network                                  | 2.06E-03       | <b>FOXM1 transcription factor network</b>             | 1.48E-06       |
| Signaling events mediated by PRL                                  | 2.91E-03       | p73 transcription factor network                      | 5.17E-06       |
| <b>Signaling events mediated by HDAC Class III</b>                | 3.72E-03       | <b>Aurora A signaling</b>                             | 3.85E-05       |
| <b>FOXM1 transcription factor network</b>                         | 8.64E-03       | Validated targets of C-MYC transcriptional activation | 2.47E-04       |
| Signaling events mediated by TCPTP                                | 9.50E-03       | Validated transcriptional targets of TAp63 isoforms   | 8.15E-04       |
| Validated transcriptional targets of deltaNp63 isoforms           | 1.09E-02       | E2F transcription factor network                      | 3.98E-03       |
| Calcineurin-regulated NFAT-dependent transcription in lymphocytes | 1.13E-02       | ATR signaling pathway                                 | 8.76E-03       |
| <b>PLK1 signaling events</b>                                      | 1.13E-02       | Validated targets of C-MYC transcriptional repression | 1.02E-02       |
| Validated targets of C-MYC                                        | 2.06E-02       | Signaling events mediated by PRL                      | 1.18E-02       |
| Regulation of cytoplasmic and nuclear SMAD2/3 signaling           | 5.79E-02       | Fanconi anemia pathway                                | 1.67E-02       |
| Direct p53 effectors                                              | 8.22E-02       | FoxO family signaling                                 | 1.79E-02       |
| IGF1 pathway                                                      | 9.36E-02       | Direct p53 effectors                                  | 2.46E-02       |
| <b>Aurora A signaling</b>                                         | 1.03E-01       | p53 pathway                                           | 3.14E-02       |
| <b>MDA-MB-231</b>                                                 | <b>P-value</b> | <b>Vari068</b>                                        | <b>P-value</b> |
| <b>PLK1 signaling events</b>                                      | 1.52E-05       | <b>PLK1 signaling events</b>                          | 9.78E-09       |

|                                                       |          |                                                                 |          |
|-------------------------------------------------------|----------|-----------------------------------------------------------------|----------|
| E2F transcription factor network                      | 1.68E-04 | Lissencephaly gene (LIS1) in neuronal migration and development | 8.44E-04 |
| <b>Aurora B signaling</b>                             | 3.52E-04 | Integrin-linked kinase signaling                                | 1.25E-03 |
| <b>FOXM1 transcription factor network</b>             | 4.39E-04 | p73 transcription factor network                                | 1.40E-03 |
| Signaling events mediated by PRL                      | 9.01E-04 | <b>Aurora B signaling</b>                                       | 1.64E-03 |
| <b>Aurora A signaling</b>                             | 1.30E-03 | <b>FOXM1 transcription factor network</b>                       | 1.98E-03 |
| Validated targets of C-MYC transcriptional activation | 1.49E-03 | <b>Signaling events mediated by HDAC Class II</b>               | 2.58E-03 |
| Validated targets of C-MYC transcriptional repression | 1.68E-03 | Validated targets of C-MYC transcriptional activation           | 4.50E-03 |
| <b>Signaling events mediated by HDAC Class II</b>     | 2.47E-03 | Sumoylation by RanBP2 regulates transcriptional repression      | 6.14E-03 |
| AP-1 transcription factor network                     | 3.72E-03 | Validated nuclear estrogen receptor alpha network               | 6.18E-03 |
| BARD1 signaling events                                | 3.91E-03 | ErbB1 downstream signaling                                      | 2.03E-02 |
| Integrin-linked kinase signaling                      | 4.41E-03 | Direct p53 effectors                                            | 2.05E-02 |
| Direct p53 effectors                                  | 9.40E-03 | Signaling events mediated by HDAC Class I                       | 2.07E-02 |
| Arf1 pathway                                          | 9.78E-03 | HIF-1-alpha transcription factor network                        | 2.07E-02 |
| RhoA signaling pathway                                | 1.45E-02 | ATR signaling pathway                                           | 2.12E-02 |

453

454

455 **Supplementary Table 25. Top-ranked altered pathways (NCI-Nature pathway**  
 456 **database) of untreated PGCCs versus non-PGCCs of Vari068 breast cancer cells.**

| <b>Vario68</b>                                        | <b>P-value</b> |
|-------------------------------------------------------|----------------|
| <b>PLK1 signaling events</b>                          | 6.70E-08       |
| E2F transcription factor network                      | 2.28E-05       |
| ATR signaling pathway                                 | 2.76E-05       |
| <b>Aurora B signaling</b>                             | 2.76E-05       |
| <b>FOXM1 transcription factor network</b>             | 3.50E-05       |
| p73 transcription factor network                      | 5.80E-05       |
| Validated targets of C-MYC transcriptional activation | 2.61E-04       |
| Direct p53 effectors                                  | 2.45E-03       |
| IGF1 pathway                                          | 3.11E-03       |
| FoxO family signaling                                 | 3.60E-03       |
| Notch signaling pathway                               | 3.84E-03       |
| E-cadherin signaling in the nascent adherens junction | 4.14E-03       |
| Validated nuclear estrogen receptor alpha network     | 6.64E-03       |
| Regulation of retinoblastoma protein                  | 6.64E-03       |
| Validated transcriptional targets of TAp63 isoforms   | 6.69E-03       |

457

458 **Supplementary Table 26 Sequences of primers for qRT-PCR**

459 hFTH1 qPCR F (CCTCCTACGTTTACCTGTCCATGTCTTAC)

460 hFTH1 qPCR R (ACCTCGTTGGTTCTGCAGCTTC)

461 hCDC20 qPCR F (GACCACTCCTAGCAAACCTGG)

462 hCDC20 qPCR R (GGGCGTCTGGCTGTTTTCA)

463 hCCNB1 qPCR F (AATAAGGCGAAGATCAACATGGC)

464 hCCNB1 qPCR R (TTTGTTACCAATGTCCCCAAGAG)

465 hActin qPCR F1 (CATGTACGTTGCTATCCAGGC)

466 hActin qPCR R1 (CTCCTTAATGTCACGCACGAT)

467

468

469



470 **Supplementary Table 27 IC50s for rescue and sensitize cells to ferroptosis by**  
471 **altering ROS.**

| Cell lines | IC50s ( $\mu$ M) |                    |                      |
|------------|------------------|--------------------|----------------------|
|            | RSL3             | RSL3 with Rotenone | RSL3 with GSK2795039 |
| Vari 068   | 0.18             | 0.12               | 0.81                 |
| SUM        |                  |                    |                      |
| 159        | 0.32             | 0.12               | 1.49                 |
| BT474      | 0.23             | 0.1                | 2.26                 |
| SKBR3      | 0.31             | 0.05               | 5.98                 |
| Mean       | 0.26             | 0.098              | 2.64                 |
| P Value    |                  | 0.014              | 0.0377               |

472

473

474

475 **Supplementary Table 28 IC50s for rescue and sensitize PGCCs to ferroptosis by**  
476 **altering ROS.**

| Cell lines | IC50s ( $\mu$ M) |                    |                      |
|------------|------------------|--------------------|----------------------|
|            | RSL3             | RSL3 with Rotenone | RSL3 with GSK2795039 |
| Vari 068   | 0.87             | 0.95               | 5.75                 |
| SUM        |                  |                    |                      |
| 159        | 0.51             | 0.48               | 2.78                 |
| BT474      | 0.18             | 0.03               | 13.64                |
| SKBR3      | 0.49             | 0.13               | 7.24                 |
| Mean       | 0.51             | 0.40               | 7.35                 |
| P Value    |                  | 0.3094             | 0.0426               |

477

478

479 **Supplementary Table 29 IC50s for rescue and sensitize non-PGCCs to ferroptosis**  
480 **by altering ROS.**

| Cell lines | IC50s ( $\mu\text{M}$ ) |                    |                      |
|------------|-------------------------|--------------------|----------------------|
|            | RSL3                    | RSL3 with Rotenone | RSL3 with GSK2795039 |
| Vari 068   | 0.37                    | 0.16               | 1.05                 |
| SUM        |                         |                    |                      |
| 159        | 0.27                    | 0.23               | 3.63                 |
| BT474      | 0.23                    | 0.03               | 12.27                |
| SKBR3      | 0.71                    | 0.24               | 15.11                |
| Mean       | 0.40                    | 0.17               | 8.02                 |
| P Value    |                         | 0.022              | 0.0382               |

481
