# Supplementary material for: Single-cell morphological and transcriptome analysis unveil inhibitors of polyploid giant breast cancer cells in vitro
Source: PubMed Central journal article supplement (PMC10739852; doi:10.1038/s42003-023-05674-5), 2023-12-21
Supplement: 42003_2023_5674_MOESM2_ESM.pdf [file 42003_2023_5674_MOESM2_ESM.pdf]

## Description of Additional Supplementary Files

**File Name:** Supplementary Movie 1

**Description:** Docetaxel treatment of SUM159 cells

**File Name:** Supplementary Data 1

**Description:** The list of compounds in the library.

**File Name:** Supplementary Data 2

**Description:** Statistical results of compounds cytotoxic effects screening for non-PGCCs.

**File Name:** Supplementary Data 3

**Description:** Statistical results of compounds cytotoxic effects screening for PGCCs.

**File Name:** Supplementary Data 4

**Description:** Statistical results of anti-PGCC inhibitors screening for non-PGCCs.

**File Name:** Supplementary Data 5

**Description:** Statistical results of anti-PGCC inhibitors screening for PGCCs.

**File Name:** Supplementary Data 6

**Description:** Source data behind the graphs in the figures.

**File Name:** Supplementary Software 1

**Description:** Code for single-cell morphological analysis.
